1           **Environmental determinants of *E. coli*, link with the diarrheal**  
2           **diseases, and indication of vulnerability criteria in tropical area**  
3                           **(Kapore, Burkina Faso)**

4  
5   Short title: *E. coli*, diarrheal diseases and vulnerabilities in Burkina Faso

6   Elodie Robert<sup>1\*</sup>, Manuela Grippa<sup>2</sup>, Dayangnéwendé Edwige Nikiema<sup>3</sup>, Laurent Kergoat<sup>2</sup>,  
7   Hamidou Koudougou<sup>4</sup>, Yves Auda<sup>2</sup>, Emma Rochelle-Newall<sup>5</sup>

8  
9   Affiliations:

10   <sup>1</sup> LETG, CNRS, Université de Nantes, Nantes, France

11   <sup>2</sup> GET, Université de Toulouse III, CNRS, IRD, Toulouse, France

12   <sup>3</sup> LERMIT, Université Joseph Ki-Zerbo, Ouagadougou, Burkina Faso

13   <sup>4</sup> Direction régionale de la santé du Centre-Est, Burkina Faso

14   <sup>5</sup> Institute of Ecology and Environmental Sciences of Paris (iEES-Paris), Sorbonne Université, Université Paris-  
15   Est Créteil, IRD, CNRS, INRAe, Paris, France

16  
17   \* Corresponding author

18   [Elodie.robert@univ-nantes.fr](mailto:Elodie.robert@univ-nantes.fr)

## 40 **Abstract**

41  
42 In 2017, diarrheal diseases were responsible for 606 024 deaths in Sub-Saharan Africa. This  
43 situation is due to domestic and recreational use of polluted surface waters, deficits in  
44 hygiene, access to healthcare and drinking water, and to weak environmental and health  
45 monitoring infrastructures.

46 *Escherichia coli* (*E. coli*) is an indicator for the enteric pathogens that cause many diarrheal  
47 diseases. The links between *E. coli*, diarrheal diseases and environmental parameters have not  
48 received much attention in West Africa, and few studies have assessed health risks by taking  
49 into account hazards and socio-health vulnerabilities. This case study, carried out in Burkina  
50 Faso (Bagre Reservoir), aims at filling this knowledge gap by analyzing the environmental  
51 variables that play a role in the dynamics of *E. coli*, cases of diarrhea, and by identifying  
52 initial criteria of vulnerabilities. A particular focus is given to satellite-derived parameters to  
53 assess whether remote sensing can provide a useful tool to assess health hazard.

54 Samples of surface water were routinely collected to measure *E. coli*, enterococci and  
55 suspended particulate matter (SPM) at a monitoring point (Kapore) during one year. In  
56 addition, satellite data were used to estimate precipitation, water level, Normalized Difference  
57 Vegetation Index (NDVI) and SPM. Monthly epidemiological data for cases of diarrhea from  
58 three health centers were also collected and compared with microbiological and  
59 environmental data. Finally, semi-structured interviews were carried out to document the use  
60 of water resources, contacts with elements of the hydrographic network, health behaviors and  
61 conditions, and water and health policy and prevention in order to identify the initial  
62 vulnerability criteria.

63 A positive correlation between *E. coli* and enterococci in surface waters was found indicating  
64 that *E. coli* is an acceptable indicator of fecal contamination in this region.

65 *E. coli* and diarrheal diseases were strongly correlated with monsoonal precipitation, in situ  
66 SPM, and Near Infra-Red (NIR) band between March and November. Partial least squares  
67 regression showed that *E. coli* concentration was strongly associated with precipitation,  
68 Sentinel-2 reflectance in the NIR and SPM, and that the cases of diarrhea were strongly  
69 associated with precipitation, NIR, *E. coli*, SPM, and to a lesser extent with NDVI.

70 Moreover, the use of satellite data alone allowed to reproduce the dynamics of *E. coli*,  
71 particularly from February to mid-December ( $R^2 = 0.60$ ) and those of cases of diarrhea  
72 throughout the year ( $R^2 = 0.76$ ). This implies that satellite data could provide an important  
73 contribution to water quality monitoring.

74 Finally, the vulnerability of the population is found to increase during the rainy season due to  
75 reduced accessibility to healthcare and drinking water sources and increased use of water of  
76 poor quality. At this period, surface water is used because it is close to habitations, free and  
77 easy to use irrespective of monetary or political constraints. This vulnerability particularly  
78 impacts the Fulani, whose concessions are often close to surface water (river, lake) and far  
79 from health centers, a situation aggravated by marginality.

80

## 81 **Author summary**

82

83 In 2017, diarrheal diseases were responsible for 1.57 million deaths, principally in Sub-  
84 Saharan Africa. Many diarrheal diseases are caused by the presence of enteric pathogens in  
85 surface water including *Escherichia coli* (*E. coli*), a frequently used indicator of the presence  
86 of these pathogens. Yet, few studies have been carried out in West Africa to verify this link or  
87 to study the relationship between diarrheal diseases, *E. coli* and environmental parameters.  
88 These diarrheal diseases also depend on socio-health vulnerabilities. This case study  
89 addresses the dynamics of *E. coli* along with another fecal indicator bacteria, enterococci, as  
90 well as diarrheal diseases (from three health centers) and socio-health vulnerability (from  
91 three villages and Fulani settlements) and their relationship with hydro-meteorological  
92 parameters derivable by satellite. The study site is located in the Bagre reservoir in Burkina  
93 Faso where Suspended Particulate Matter (SPM) and *E. coli* were monitored over one year.  
94 Water was generally polluted by bacteria of fecal origin throughout the year and more so  
95 during the rainy season. We observed a significant relationship between *E. coli* and  
96 enterococci. *E. coli* concentrations were strongly correlated to, and predicted by, precipitation,  
97 satellite reflectance in the NIR band by Sentinel-2, and SPM measured in-situ. Diarrheal  
98 diseases were also strongly correlated with these variables as well as *E. coli*. Vulnerability of  
99 the population to diarrhea increases during the rainy season. The microbiological health risk is  
100 more important during the rainy season, from June to September, and especially concerns the  
101 Fulani settlements.

102

103

104

105

## 106 Introduction

107 In 2016, waterborne diseases were the second leading cause of death in low-income countries  
108 [1]. In particular, in 2016 diarrheal diseases constituted the 8th most important cause of death  
109 for all age groups combined and the fifth leading cause of death for children under 5-years  
110 [2]. In 2017, diarrheal diseases were responsible for 1.57 million deaths, of which 534 000  
111 were children under 5-years [3]. Five main factors drive this situation: 1) high pollution of  
112 surface water by micro-organisms from animal and human faeces, 2) widespread use of  
113 untreated surface water for domestic, washing, gardening and recreational uses, 3) deficient  
114 hygiene, 4) lack of nearby sanitation and health infrastructures, and 5) weak or non-existent  
115 environmental and health monitoring infrastructures [4-5].

116 The highest health burden occurs in Sub-Saharan Africa where only 56% of the population  
117 currently has access to improved water sources<sup>1</sup> [4]. In this region, in 2017, 85 million people,  
118 the large majority of whom live in rural areas, were still using unimproved surface water as  
119 their drinking and domestic water source. In addition to this, an estimated 180 million people  
120 use unimproved water and a further 135 million people have limited access, i.e. round trip  
121 travel time exceeding 30mins, to improved water sources [5]. In the rural areas of Burkina  
122 Faso: 35% of the population has access to improved water within 30mins and 33% more than  
123 30mins, with remaining 31% only having access to unimproved water including surface water  
124 [5]. However, it is probable that numbers concerning access to improved water by the Joint  
125 Monitoring Program (JMP) are overestimated, especially in rural areas. This is due to a  
126 combination of socio-economic and environmental factors which may prevent access to  
127 improved water [6] or because the continuity of service is not taken into account in the JMP  
128 estimations. For example, in Burkina Faso, a bore-hole pump breakdown is officially declared  
129 when it lasts at least 1 year and 1 day [7]. It is also worth noting that the coverage of rural  
130 water supply services fell by 16 percentage points between 2000 and 2017 [5].

131 Many diarrheal diseases are caused by the presence of microorganisms in surface water  
132 including fecal pathogens: 1) bacteria as typical enteropathogenic *Escherichia coli* (*E. coli*) or  
133 enterotoxigenic *E. coli* (gastroenteritis, diarrhea), *Shigella* spp (shigellosis or bacterial  
134 dysentery), *Salmonella* spp. (typhoid fever), *Vibrio cholerae* (cholera); 2) parasites as  
135 *Cryptosporidium* spp (cryptosporidiosis), *Entamoeba histolytica* (amebiasis or amoebic  
136 dysentery); and 3) viruses as rotavirus, norovirus, astrovirus and adenovirus (gastroenteritis,

---

<sup>1</sup> The official Joint Monitoring Program definition is the percentage of the population with access to at least 20 l of water per person per day from an improved drinking water source (household connections, public standpipes, boreholes, protected dug wells, protected springs, and rainwater collection) within one kilometre of the user's dwelling.

137 diarrhea). Concerning, the bacterial risk, studies have shown that *E. coli* can be used to  
138 indicate a probable presence of fecal borne pathogens of bacterial origin (i.e. enteric  
139 pathogens) [8-10]. In temperate areas, improvements in *E. coli* detection methodology made  
140 the analysis of thermotolerant (fecal) coliforms unnecessary to assess water quality  
141 monitoring [11]. *E. coli* is therefore considered to be the best indicator of fecal contamination  
142 or FIB - Fecal Indicator Bacteria [11-13] in these regions. It is recommended by the World  
143 Health Organization (WHO) to assess water contamination and the associated risk of diarrheal  
144 diseases [14]. However, this indicator has been questioned due to the possibility of  
145 naturalization of *E. coli* in the environment [15-18], especially in humid tropical systems rich  
146 in nutrients and organic matter (OM) [19].

147 Few studies have been devoted to *E. coli* in tropical environments, and they mainly focused  
148 on coastal zones [20-22], wells, pumps, and boreholes [23-25], or in upland streams in the  
149 humid tropics [26-27] but rarely on surface waters in semi-arid areas. Rochelle-Newall et al.  
150 [28] underlined the knowledge gaps that remain for tropical ecosystems as regards to *E. coli*  
151 survival, transfer and partitioning between free or particle attached fractions [29-30], as well  
152 as their relationships with human activities and natural processes and the ultimate impacts on  
153 human health. Tropical environments are subject to higher average temperature and more  
154 intense precipitation events, which can induce elevated rates of soil erosion resulting in high  
155 concentrations of particles in surface waters. This suspended particulate matter (SPM) can  
156 provide a refuge from predation for bacteria and create a favorable environment for their  
157 development, and multiplication.

158 Statistically significant relationships between FIB, SPM values and certain environmental  
159 parameters (temperature, precipitation) have previously been observed in temperate  
160 environments [31-34]. For the humid tropics, the presence of *E. coli* and other FIB in surface  
161 waters was found to be linked to temperature, precipitation and onset date of the rainy season,  
162 land cover, and sediment resuspension [35-38]. Abia et al. [39], in South Africa, and Cronin  
163 et al. [40], in Mozambique, observed an increase in *E. coli* and thermotolerant coliforms  
164 respectively, at the onset of the rainy season. Musa et al. [41] also observed a link between *E.*  
165 *coli* and the rainy season in their study from Sudan. Looking at the causes of a diarrhea  
166 outbreak in South Africa, Effler et al. [42] showed that the first heavy rains, following 3  
167 months of drought, and the excretion of *E. coli* by cattle were important contributing factors.  
168 However, apart from these studies mainly carried out in Southern Africa, and notably in South  
169 Africa, important knowledge gaps remain on *E. coli* dynamics in surface water and their links  
170 with hydro-meteorological parameters, particularly in West Africa.

171 Beyond the direct link between the pathogens responsible for diarrheal diseases and  
172 environmental parameters, several studies have highlighted the predominance of diarrhea  
173 either during the tropical rainy season [43-44], when temperatures are higher [45-47], during  
174 floods [48-50], or during periods of abundant precipitation [51, 50] following a dry period.  
175 Carlton et al. [52] observed a decrease of -26% in diarrhea cases when the rains followed a  
176 wet period. Overall, these studies suggest that diarrhoea rates are positively correlated with  
177 increasing temperature and show a more complex relationship with precipitation. Few studies  
178 have examined the links between environmental factors and diarrheal diseases in sub-Saharan  
179 Africa despite this being the geographic area with the greatest burden. Indeed, Levy et al. [50]  
180 found only 11 articles from Sub-Saharan Africa (4 in Southern Africa, 3 in West Africa, 2 in  
181 East Africa and 2 reviews) out of 141 produced worldwide. In West Africa, Dunn et al. [53-  
182 54] showed that the risk of diarrhea increased in hotter and drier climates, in areas of high  
183 rainfall and in low-elevation areas (coastal and along rivers).

184  
185 Climate change is anticipated to have a strong impact on both the quantity and quality of  
186 water resources, potentially boosting the presence, dissemination and transmission of  
187 pathogens [55, 52, 56]. Some authors expect that the relative risk of diarrhea in tropical and  
188 subtropical regions will increase, on average, by 8-11% for the period 2010-2039, by 15-20%  
189 for the period 2040-2069, and by 22-29% for the period 2070-2099 [57]. In addition, the  
190 extension of cultivated areas may promote surface runoff which increases SPM and possibly  
191 microbial pathogen occurrence in surface waters [58]. Sub-Saharan Africa is undergoing  
192 major changes in terms of demographic growth [59] and social and political insecurity that  
193 challenge access to clean water and healthcare [60]. Understanding the complexity of  
194 interactions between pathogens, environmental parameters, social factors and diarrheal  
195 diseases therefore represents an important societal challenge for the forthcoming years.

196  
197 Water carrying microbiological contaminants represents what can be described as “health  
198 hazard”. This health hazard combines with socio-health vulnerabilities of impacted  
199 populations to result in a microbiological health risk, in our case, diarrheal diseases. This risk  
200 is a multidimensional, multifactorial and constructed process that evolves in time and space  
201 [61]. Its analysis requires a holistic approach that integrates biophysical parameters and the  
202 characterisation of the pathogens together with the social dimensions. The latter includes  
203 exposure (socio-spatial organization and temporal dynamics), sensitivity or susceptibility  
204 which refers to social and ecological fragility (practices, water uses, access to drinking water,

205 to a healthcare network, existence of prevention policy, etc.), and forms of resilience [62].  
206 Ultimately, to protect against a risk, a person must perceive the risk as such, know how to  
207 protect herself or himself against that risk, and have the means and resources to do so. In  
208 addition, inequalities depend on several determinants, in particular, distance [63-64], the size  
209 of the household [64] which increases the likelihood of encountering difficulties in paying for  
210 care, and the cost of treatment. In Burkina Faso, Haddad et al. [63] showed that socio-  
211 economic inequality in access to care is most evident in rural areas: 20% of the richest go to  
212 the health center on the first day of illness, whereas 20% of the poorest wait until the 5th day  
213 to consult.

214  
215 Few interdisciplinary studies have combined microbiological monitoring and the study of  
216 hydro-meteorological parameters with epidemiological analysis of diarrhea cases and  
217 interviews to understand surface water use and healthcare access in tropical areas [65, 26]. To  
218 our knowledge, this type of study does not exist in West Africa. Our study applies this  
219 original approach to a rural area of Burkina Faso: the Bagre Reservoir region. The objectives  
220 of this work were 1) to compare the dynamic of *E. coli* and enterococci in a rural sub-Saharan  
221 system, 2) to characterize the hydro-meteorological parameters playing a role in the dynamic  
222 of *E. coli*, 3) to reveal the diarrheal epidemiology/incidence in the Kapore region and the  
223 associated environmental factors, and 4) to identify the initial criteria of socio-health  
224 vulnerabilities.

## 225 **Material and methods**

### 226 **Study Area**

227 The Bagre Reservoir is located in the Center-East region of Burkina Faso (Fig 1A). The  
228 average area of the reservoir is 20,000 ha and the maximum area is 25,500 ha, with a volume  
229 of 1.7 billion m<sup>3</sup>, corresponding to 14% of freshwater resources in Burkina Faso. The  
230 reservoir is located in a basin covering 33.500 km<sup>2</sup> and belongs to the Nakambe River  
231 catchment. The Nakambe catchment is the second largest watershed in Burkina Faso, and it is  
232 embedded in the Volta River Basin. The Bagre Reservoir was built in 1992 for hydro-  
233 agricultural and hydroelectric purposes. The filling of the reservoir led to numerous  
234 modifications in terms of territorial recomposition and the surrounding region has undergone  
235 significant changes since the 1980s in terms of health, population growth (natural and  
236 migratory), and land use [66-68].

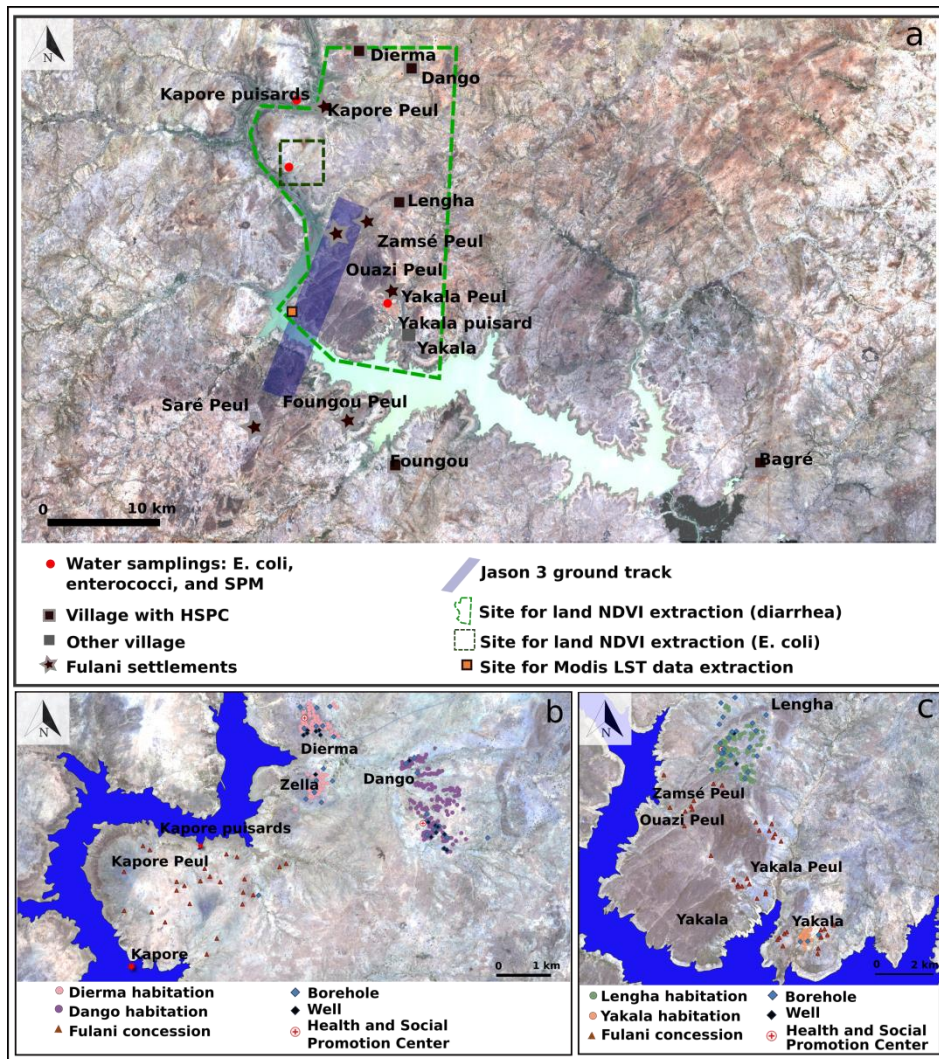

237  
 238 **Fig 1. (a) Study Area (Sentinel-2 image 22/04/2018); (b) Zoom on the area of Dango, Dierma and Kapore;**  
 239 **(c) Zoom on the area of Lengha, Lengha Peul, Yakala and Yakala Peul**

240 The region belongs to the Tropical Savannah eco-climatic zone of the Köppen classification.  
 241 It is characterized by two well marked seasons: a rainy season from June to September, with  
 242 July, August and September contributing to 67% of the annual rainfall on average, and a dry  
 243 season from October to May (Fig 2). Between 2000 and 2018, annual precipitation varied  
 244 between 542.8 mm and 1171.1 mm at the Tenkodogo station with an average of 853.1 mm  
 245 (Direction Nationale de la Météorologie du Burkina Faso, Fig 2). The annual rainfall in 2017  
 246 and 2018 was 645.2 mm and 1057.5 mm, respectively. Thus, 2017 can be considered as a  
 247 deficit/dry year and 2018 as a humid/wet year. Regarding temperature, the dry season from  
 248 October to May is characterized by two distinct periods: a dry and cooler period from October  
 249 to January, and a dry and hot period from February to May. The average temperature varies  
 250 from 25.6 to 28.4°C (maximum temperature between 33.9 and 37.1°C and minimum  
 251 temperature between 18.1 and 23.1°C, the minimum being reached in January) during the



252 first, and the average temperature varies between 28.8 to 31.6°C with a maximum average  
253 temperature of 33.2°C in April during the second period (Fada N’gourma Station, Direction  
254 Nationale de la Météorologie). During the rainy season, average temperatures are close to  
255 those observed in December and January (Fig 2) with average temperatures from 26.2 to  
256 29.1°C. Finally, daily surface water temperatures (24-hour average from day and night data)  
257 extracted from the MODIS satellite data [69] on an area downstream the sampling site (Fig  
258 1A, see also the satellite data section below) show a seasonal variability similar to air  
259 temperature but with a lower seasonal amplitude ranging from 29.7 to 30.3°C (average night  
260 temperature from 29.4 to 29.9°C, average day temperature from 30.0 to 30.8°C).

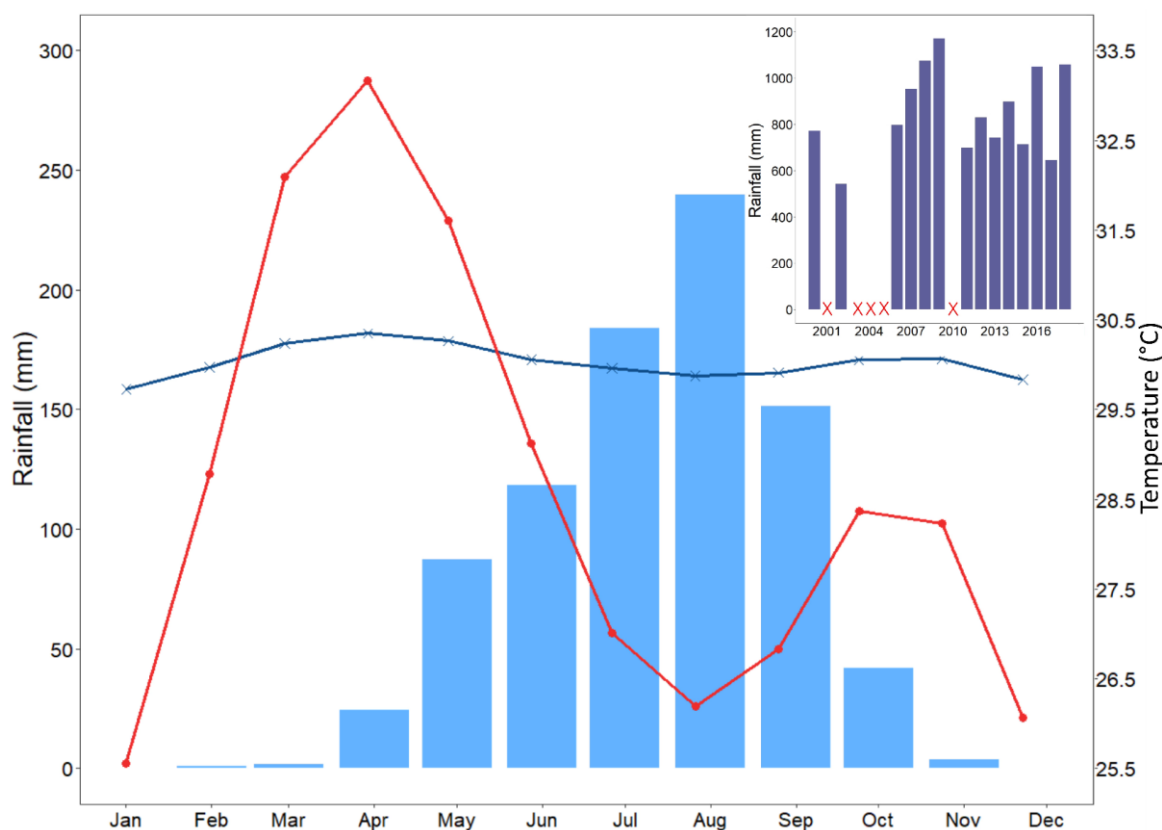

261  
262 **Fig 2. Average monthly rainfall for the period 2000-2018 (bar chart in blue, Tenkodogo station), air**  
263 **temperatures for the period 2000-2018 (red line with dots, Fada N’Gourma station) and satellite\_derived**  
264 **surface water temperatures for the period 2000-2018 (blue line with crosses). Annual rainfall from 2000 to**  
265 **2018 is shown in the inset (no data is available for 2001, 2003-2005 and 2010)**  
266

267 A routine water sampling point was set up in March 2018 at Kapore (11.663010, -0.776650°,  
268 Fig 1A) in the upstream part of the Bagre Reservoir to monitor SPM, *E. coli* and enterococci.  
269 This site is suitable for satellite monitoring by Sentinel-2 (spatial resolution of 10 - 20 meters)  
270 throughout the year. The sample site is located near three farming villages (Dango, Dierma

271 and Lengha), each with a Health and Social Promotion Center (HSPC), and Fulani camps (Fig  
272 1B, C). The main indigenous ethnic group is Bissa, followed by Mossi and Fulani.

273  
274 The study area is located in the Health district of Garango. The Dierma HSPC was built in  
275 1992, its health area had 4,167 inhabitants in 2018. The Dierma health area includes Fulani  
276 concessions near to Kapore (Kapore Peul) which are located between 5.5 and 10 km from the  
277 Dierma HSPC and between 2.5 and 7 km from boreholes and wells of Zella (the nearest  
278 neighborhood of the village of Dierma, Fig 1B). There is only one borehole at Kapore Peul  
279 and some concessions are located more than 3 km away (Fig 1B), forcing people to use  
280 surface water including the lake. The Dango HSPC opened in 2006, its health area included  
281 3,999 inhabitants in 2018. Half of the people coming for consultations live outside this health  
282 area (e.g. coming from Lengha or Dierma). The village of Dango does not have Fulani  
283 settlements (Fig 1B). The HSPC of Lengha was created in 1994 and its health area included  
284 8,396 inhabitants in 2018 (including Koumboré: 2,084 inhabitants, Lengha: 4,243 inhabitants,  
285 Ouazi Peul and Zamsé Peul composing Lengha Peul: 746 inhabitants, Massougou: 564  
286 inhabitants, and Yakala: 669 inhabitants). The Zamsé Peul concessions are close to Lengha  
287 and people use the nearest Lengha well. The Ouazi Peul concessions are located 2.5 km from  
288 the Lengha wells (Fig 1C). The Yakala Peul concessions are located between 3 km and 5.5  
289 km from the first wells of Lengha, 7 km from HSPC and 5 km from the Yakala boreholes (Fig  
290 1C). However, there is a well at Yakala Peul used by nearby concessions but not by those  
291 further away (Fig 1C). Finally, Yakala has 3 boreholes and is located 9 km from Lengha (Fig  
292 1C). This situation in the Lengha region forces certain populations, mainly Fulani, to use  
293 surface water, including the lake. In addition to the services provided by the HSPC the  
294 population also consults traditional healers.

295 Populations living near the banks of the Bagre Reservoir depend on nearshore water for  
296 drinking, cooking, dish and clothes washing, showering or bathing and recreation (Fig 3 A).

297 Land use around the sampling site is dominated by croplands (rain-fed subsistence) with some  
298 rangelands, where herds are led to graze and drink. During "normal" rainfall years, the  
299 animals gather at the lake in April, when the other water points have dried up, and stay there  
300 until June-July. The banks of the lake and the shallow waters are also used for market  
301 gardening from March onwards and rice is cultivated during the rainy season. During wet  
302 years, the lake water level is sometimes too high to permit market gardening. While 2017 was  
303 a particularly dry year (Fig 2), in 2018, the shallow waters and lake banks were used from

304 March onwards for market gardening and the herds arrived earlier than usual, in March (Fig 3  
305 B).

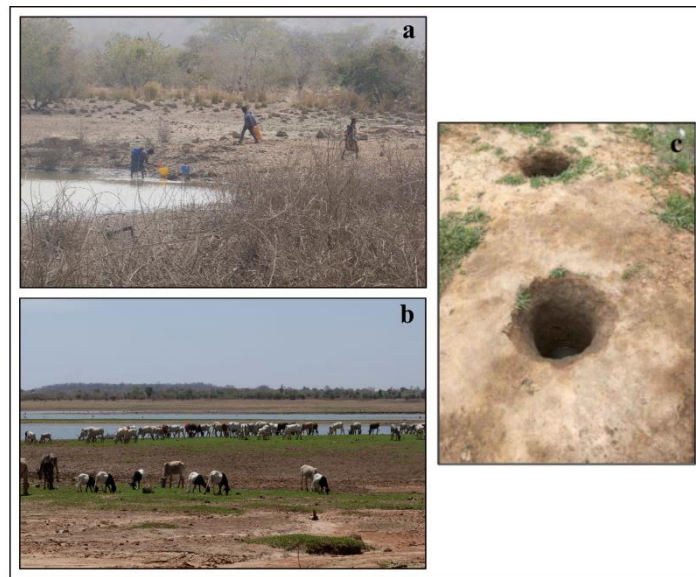

306  
307 **Fig 3. (a) Ouazi Peul: example of site where water of the Bagre Reservoir is drawn for different domestic**  
308 **uses (drinking, cooking, washing, washing clothes), (b) livestock breeding at the Kapore routine site**  
309 **(2018/03/02), (c) “Puisard”**

310

### 311 **In situ data**

#### 312 ***Water sampling***

313 Samples of surface water were routinely collected (just under the surface of water) in clean  
314 plastic bottles (500 ml) every 7 days from March 2018 to April 2019 at the Kapore site (Fig  
315 1A) to perform SPM, *E. coli* and enterococci measurements. In addition, water samples were  
316 also collected during two field campaigns in March 2018 and July 2018 to measure the same  
317 parameters at different sites around the lake. Samples were also collected from “*puisards*”,  
318 open holes dug in the sand of dry riverbeds and banks of the lake where water is drawn for  
319 domestic use (Fig 3C).

320 SPM was measured on duplicate sub-samples (30-100 ml) of water that were filtered on to  
321 glass fiber filters (Whatman GF/F 0.7  $\mu\text{m}$  nominal pore size). Filters were pre- weighed after  
322 oven-drying at 105°C for 1 h 30 min. After sample filtration, the filters were dried and re-  
323 weighed. SPM was calculated as the difference between the dry weights after and before  
324 filtering divided by the volume of filtered water.

325 *E. coli* and enterococci counts were determined using the standardized microplate method (NF  
326 EN ISO 9308-3 and NF EN ISO 7899-1 for *E. coli* and enterococci counts, respectively).

327 Each sample was incubated at four dilution rates (i.e. 1:2, 1:20, 1:200 and 1:2000 with a  
328 volume of 150 µl in well) in a 96-well microplate (MUG/EC and MUD/SF, BIOKAR  
329 DIAGNOSTICS) and incubated for 48h at 44°C. Ringers' lactate solution was used for the  
330 dilutions and one plate was used per sample. The number of positive wells for each  
331 microplate was noted and the Most Probable Number (MPN) was determined using the  
332 Poisson distribution. We used the “MPN CALCULATOR” software to perform the  
333 conversion between the number of wells detected and the MPN / 100 ml *E. coli* and  
334 enterococci values [71]. The detection limit is 50 MPN / 100 ml. Values below this limit were  
335 assigned a value of 1. This method has been used successfully in other tropical environments  
336 [27].

337

### 338 ***Epidemiological data***

339 Health data for diarrheal diseases were collected at Garango, which collects all the health data  
340 from the health district, with the agreement of the Ministry of Health. This study focused on  
341 three HSPC (Dierma, Lengha and Dango, Fig 1B, C), which correspond to the area where the  
342 routine measurements were carried out (Fig 1A). Data were collected for the period from  
343 January 2013 to March 2019 (except for the Dango HSPC, for which data ends in December  
344 2018). Regarding diarrheal diseases, we considered four groups: typhoid fever, dysentery,  
345 non-bloody diarrhea, bloody diarrhea. The data has a monthly time step, except for bloody  
346 diarrhea which is listed weekly.

347 Data from several Annual Action Plans were also collected. They contain information on the  
348 area covered by the HSPC (geography, socio-economic and cultural aspects), the distribution  
349 of the population across the HSPC area, dominant pathologies, resources (infrastructure,  
350 material resources and equipment, means of communication, energy sources, human  
351 resources, financial resources), curative activities, and planning of strategic activities for the  
352 following year.

353

### 354 **Satellite data**

355 High frequency satellite-derived rainfall data were averaged over the Kapore area, including  
356 the two main tributaries located upstream of the sampling point (Fig 1A). We used the GPM  
357 IMERGHHV6 data product (30mins), which is suited for monitoring rainfall in tropical  
358 regions [72-74]. Rainfall data were cumulated per day and also over 8 day periods to be

359 consistent with the timing of the lake water sampling. Data were collected through the  
360 Giovanni website (<https://giovanni.gsfc.nasa.gov/giovanni/>).

361 Altimetry data from Jason-3 were used to monitor the water level of the Bagre Reservoir from  
362 01/03/2018 to 01/04/2019. Jason-3 provides 10-day data for the track that crosses the Bagre  
363 Reservoir (Fig 1A). They were collected from the Dahiti website [75],  
364 <https://dahiti.dgfi.tum.de/en/943/water-level-altimetry/>).

365 Sentinel-2 surface reflectance products were used to observe the dynamics of surface water  
366 reflectance and area at Kapore. Data were obtained from the THEIA data gateway  
367 ([theia.cnes.fr](https://theia.cnes.fr)). The revisit time is 5 days when Sentinel 2A and 2B are combined. To detect  
368 surface water and estimate water areas, we used a threshold on the Modified Normalized  
369 Difference Water Index (MNDWI which is calculated as the normalized difference between  
370 the green and the SWIR bands). Robert et al. [76] applied a 0.2 threshold for the Agoufou  
371 lake in Mali. Environmental conditions for Bagre led us to retain a lower MNDWI threshold,  
372 namely 0.075, above which a pixel is considered to be water. Although images are corrected  
373 for atmospheric effects using the MAJA software [77-78], we added additional thresholds to  
374 avoid undetected residual clouds and retained only blue reflectance values lower than 0.16  
375 and red reflectance values higher than 0.035.

376 Sentinel-2 Surface reflectance products were also used to monitor the seasonal dynamics of  
377 the vegetation close to Kapore by averaging the land Normalized Difference Vegetation Index  
378 (NDVI) over two areas: a "small" area which potentially impact the dynamics of *E. coli* at the  
379 Kapore site and a "large" area to study the link with the dynamics of diarrhea cases over the  
380 whole health area of the three HSPC (Fig 1A). NIR reflectance was used to monitor the  
381 dynamics of SPM following Robert al. [79-80, 76].

382 Finally, the Land Surface Temperature (LST) and Emissivity product MOD11A2 (MODIS  
383 sensor on-board TERRA) which provides land surface temperature at 1km resolution, was  
384 used to extract the daily surface water temperatures (24-hour average from day and night  
385 data). MODIS LST 8-day composite data for daily and nightly overpasses (around 10:30 am  
386 and 10:30 pm local time) were extracted using Google Earth Engine  
387 (<https://earthengine.google.com/>). Because of its spatial resolution, LST was extracted over an  
388 area slightly downstream from the sample site, where the lake is larger (Fig 1A).

389

## 390 **Interviews**

391 Semi-structured interviews were carried out in March 2016 and 2018 with staff of each HSPC  
392 (field health officer and nurse in Lengha, nurse in Dango, field health officer and nurse in  
393 Dierma), with a community health club, with 31 local residents from the villages of Dierma  
394 and Lengha, as well as with the population of the Fulani settlements (Ouazi Peul, Zamsé Peul,  
395 Kapore Peul, Yakala Peul, Lengha Peul, Fig 1B, C). Interviews with health staff focused on:  
396 the most important pathologies, diarrheal diseases (incidence, causes, people most affected),  
397 use of the health center, accessibility issues, and prevention campaigns. The interview grid for  
398 the local residents was developed by adapting the concept of “livelihood” (developed by  
399 Chambers [80]) to characterize vulnerability criteria: physical, financial, human and social  
400 capital by adding new criteria like practices, distances, seasonality, and marginalities. It was  
401 constructed around 4 points and related to: i) activity and environment, use of water resources  
402 (type of use - consumption, domestic, recreational, livestock, agriculture - depending on the  
403 type resource - improved water source, unimproved water source, river, rain); ii) contacts with  
404 elements of the hydrographic network (places and periods); iii) health behaviors and  
405 conditions (use of traditional healers, HSPC, self-medication, distance and travel time from  
406 HSPC, financial, cultural, and technical availability, etc.); iv) water and health policy and  
407 prevention (transformations in access to care following a new building, easier access,  
408 prevention and / or awareness campaigns, etc.). Although there were no interviews carried out  
409 in Dango, we included cases of diarrhea from this health center, because people from Dierma  
410 and Lengha use this health center.

411

## 412 **Ethics statement**

413 The Ethics committee on non-interventional research (CERNI) of the University of Nantes  
414 approved the study (approval number: n°19112020). Before starting each interview, we asked  
415 for oral consent from each respondent.

416

## 417 **Statistical analysis and software**

418 FIB (*E. coli* and enterococci) data were  $\log_{10}$  transformed to achieve a normal distribution.  
419 We calculated correlations and regressions to identify explanatory variables predicting *E. coli*  
420 and cases of diarrhea. First, standard Pearson analysis was performed for correlations between  
421  $\log_{10}$  transformed *E. coli* and enterococci, and between in-situ SPM and the Near Infrared  
422 (NIR) band. Pearson's correlation (r) is preferred to study these relationships, because a linear

423 relationship can be expected and tested. Spearman's rank correlation was used for *E. coli*  
424 concentrations and environmental parameters (SPM, water level, rainfall, NDVI, number of  
425 water pixels) and cases of diarrhea (incidence). Spearman's rank correlation ( $r_s$ ) is preferred in  
426 these cases because these datasets do not have normal distributions and linear relations are not  
427 expected.

428 Partial Least Squares (PLS) regression was used to detect dependencies between variables and  
429 to construct a predictive model for *E. coli* concentration and for the dynamics of diarrhea  
430 cases. We have chosen the PLS regression because it handles missing data by imputation, it is  
431 poorly sensitive to multicollinearity, and it decomposes the variability into components  
432 (projection in subspaces). PLS regression (for *E. coli* and cases of diarrhea) were applied to  
433 obtain a model using all variables, then a model using a smaller number of variables (the main  
434 explanatory variables), and last, a model based on key remote sensing variables only. The  
435 choice of key variables was based: on the calculation of the percentage variability explained  
436 by each variable on the PLS retained components, and the correlation circle.

437 The package CRAN R plsdepot [81] was used for the PLS [82]. The CRAN R package  
438 ggplot2 [83] was used for plot construction.

## 439 **Results**

### 440 **Water microbiology: bacterial pathogens**

441 From 13 March 2018 to 02 April 2019, 38 measurements of *E. coli* and enterococci were  
442 made. The values of *E. coli* vary between less than 50 and 15,000 MPN 100 mL<sup>-1</sup> and those of  
443 enterococci between less than 50 and 26,000 MPN 100 mL<sup>-1</sup> (Fig 4). 58% of the *E. coli*  
444 samples and 70% of enterococci samples exceed USEPA [84] daily bathing water quality  
445 standards (single sample: limit of 35 MPN 100 mL<sup>-1</sup> for enterococci and 126 MPN 100 mL<sup>-1</sup>  
446 for *E. coli*). The majority of samples are above the detection threshold of 50 MPN 100 mL<sup>-1</sup>  
447 so they do not comply with the WHO recommendation for drinking water supply sources that  
448 exclude all values above 0 MPN 100 mL<sup>-1</sup>.

449 *E. coli* and enterococci show a similar temporal dynamic (Fig 4). The lowest values are  
450 observed from March 2018 to June 2018 and from October 2018 to March 2019. The main  
451 peaks are observed in July and at the end of August. Both parameters have very low values  
452 from mid-December to early February.

453

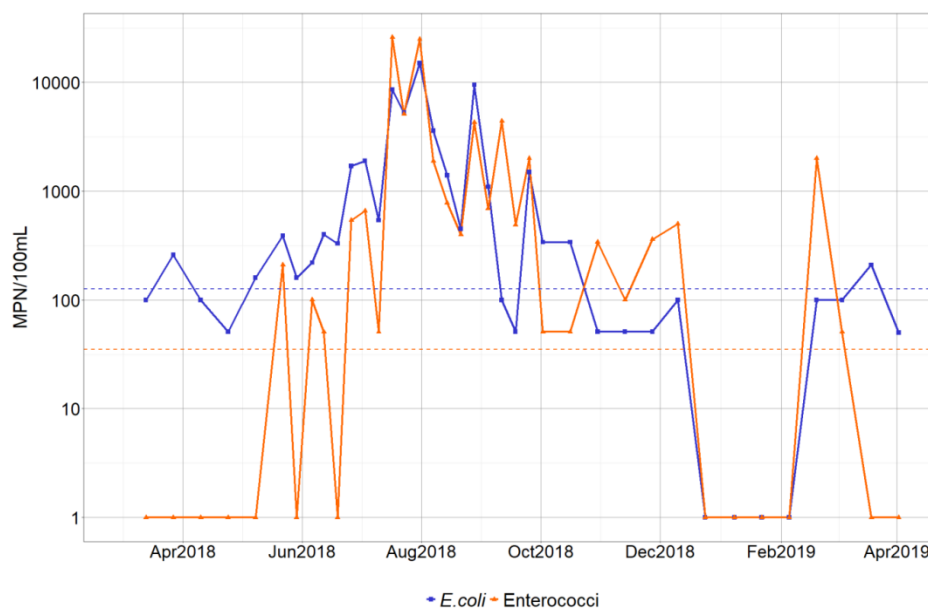

454  
 455 **Fig 4. Temporal dynamics of *E. coli* and enterococci at the Kapore site (horizontal dotted lines correspond**  
 456 **to USEPA 2012 bathing water quality standard: dotted lines in orange and blue show the limit for**  
 457 **enterococci and *E. coli*, respectively)**  
 458

459 *E. coli* and enterococci numbers are significantly correlated ( $r = 0.85$ , without the values of  
 460 the “puisards”; Fig 5, Table 1). Two specific “outlier” groups can also be noted. The first  
 461 group, corresponding to the period from March to mid-June (except two dates: 22/05/18 and  
 462 06/06/2018) has low values of enterococci (less than 50 MPN 100 mL<sup>-1</sup>) whereas *E. coli* vary  
 463 between 51 and 330 MPN 100 mL<sup>-1</sup>. The second group, comprised of one value from mid-  
 464 September and 3 values from November-early December, has relatively low *E. coli* (51 and  
 465 100 MPN 100mL<sup>-1</sup>) but high enterococci values (340 to 4400 MPN 100 mL<sup>-1</sup>, Fig 4).

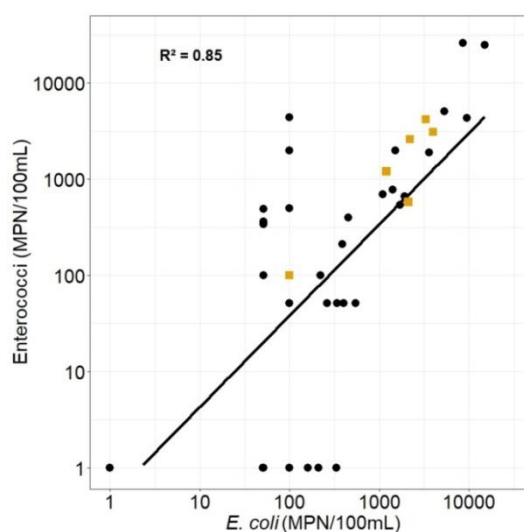

466  
 467 **Fig 5. Enterococci vs *E. coli* for the Kapore routine point (N=38), and for “puisards” (N=6, yellow**  
 468 **squares).**



469 The water samples from the “puisards” are consistent with the relationship between *E. coli*  
 470 and enterococci in the Bagre Reservoir (Fig 5). Values of *E. coli* and enterococci in the  
 471 “puisards” range from 100 MPN 100 mL<sup>-1</sup> during the dry season to 3000-4000 MPN 100 mL<sup>-1</sup>  
 472 during the rainy season. The values always exceed guideline values (0 MPN 100 mL<sup>-1</sup>) for  
 473 water for domestic use. The FIB counts observed during the dry season in “puisards” are  
 474 similar to those observed at the lake routine sampling point. During the rainy season, the  
 475 values measured in the "puisards" are lower than those measured at the routine point (1200  
 476 MPN 100 mL<sup>-1</sup> versus 5100 MPN 100 mL<sup>-1</sup>).

#### 477 **Dynamics of *E. coli* in relation to environmental variables**

478 *E. coli* is strongly correlated with precipitation ( $r_s = 0.8$  for weekly rainfall,  $r_s = 0.64$  for daily  
 479 rainfall), with SPM ( $r_s = 0.66$ ), and with Sentinel-2 satellite NIR band data ( $r_s = 0.77$ ) (Fig 6,  
 480 Table 1).

481 **Table 1. Correlation coefficients obtained by regressing *E. coli* and enterococci, and *E. coli* and**  
 482 **environmental variables (N=38 for enterococci, SPM, weekly and daily rainfall; N= 16 for cumulative**  
 483 **rainfall; N= 22 for land NDVI, Sentinel-2 data; N= 19 for water pixels and water level)**  
 484

| Environmental and microbiological variables    | Correlation          |
|------------------------------------------------|----------------------|
| Enterococci                                    | $r = 0.85^{*****}$   |
| SPM                                            | $r_s = 0.66^{*****}$ |
| Weekly rainfall Kapore                         | $r_s = 0.8^{*****}$  |
| Daily rainfall Kapore                          | $r_s = 0.64^{*****}$ |
| Cumulative rainfall (13/03/2018 to 31/07/2018) | $r_s = 0.9^{*****}$  |
| Number of water pixels                         | $r_s = 0.07$         |
| Water level                                    | $r_s = -0.22$        |
| Surrounding land NDVI                          | $r_s = 0.30$         |
| Sentinel-2 NIR                                 | $r_s = 0.72^{*****}$ |

485 **\*\*\*\*\*corresponds to p-values < 0.0001**

486  
 487  
 488  
 489

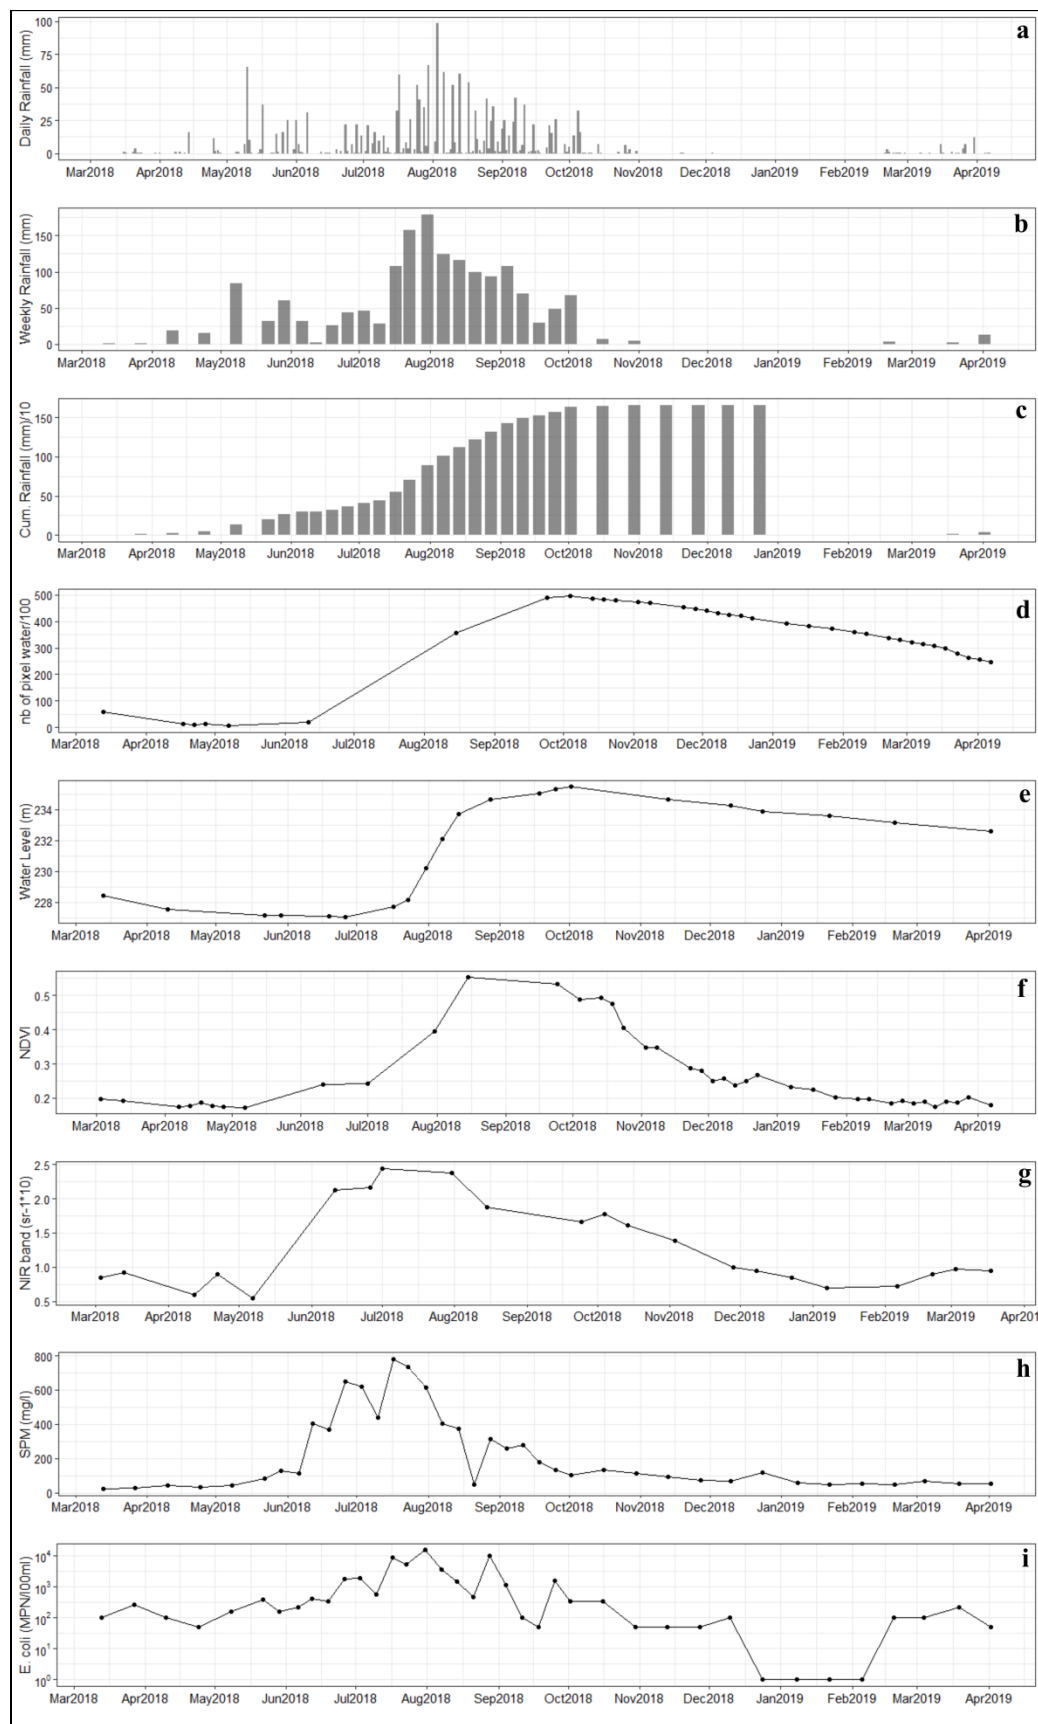

490

491 **Fig 6. (a) Daily rainfall, (b) Weekly rainfall, (c) Cumulated weekly rainfall, (d) Number of water pixels**

492 **from Sentinel-2 data, (e) Water level, (f) Average land NDVI from Sentinel-2 data, (g) Water NIR**

493 **Reflectance (Sentinel-2), (h) SPM, (i) *E. coli*.**

494 Weekly values of SPM and *E. coli* display close seasonal variations (Fig 6H, I). Starting in  
495 mid-May, both SPM and *E. coli* values increase in parallel with the arrival of the first heavy  
496 rains (Fig 6A) and peak during peak rainy season. Infra-seasonal fluctuations of SPM and *E.*  
497 *coli* during the rainy season seem to correspond to variations in precipitation (Fig 6A, B). In  
498 addition, the leading role of precipitation is illustrated by the strong relationship observed  
499 between *E. coli* and cumulative rainfall and between SPM and cumulative rainfall from  
500 March 13 to July 31, 2018:  $r_s = 0.9$ , and  $r_s = 0.88$ , respectively (Fig 6C, Table 1). Interestingly,  
501 although an increase in bacteria number and SPM concentration is observed when land NDVI  
502 is low, both variables decrease when vegetation cover is maximum (September-October)  
503 despite significant rainfall (Fig 6F). The lowest values of *E. coli* and SPM are observed from  
504 October to early April. In January, in the middle of the dry season, values of less than 51  
505 MPN 100 mL<sup>-1</sup> for *E. coli* and 47.5 to 116.5 mg/l for SPM are found.

506  
507 A two-week time-lag between the peaks of SPM and *E.coli* is observed at the core of the rainy  
508 season with the peak of SPM occurring around mid-July 2018 (780 mg/l) and that of *E. coli*  
509 (15,000 MPN 100 mL<sup>-1</sup>) occurring at the end of July 2018.

510  
511 A good correlation is observed between Sentinel-2 water reflectance and in-situ SPM values,  
512 in particular for the Near Infrared (NIR) band ( $r=0.91$ ), in line with previous studies [85, 75].  
513 Satellite NIR reflectances display a seasonal dynamic similar to that of *E. coli*: increase from  
514 May until the end of July-beginning of August, then decrease to reach low values in January,  
515 and an increase from February 2019 (Fig 6G).

516  
517 The first component of PLS regression explains 66% of the variability of *E. coli* from  
518 environmental variables and the second one 2% (S1 Fig). The NIR band, SPM, and Weekly  
519 rainfall display the highest correlations with the first component of the PLS (i.e. variance  
520 explained above 70%, S1 Table, Fig 7). This is in line with results of the one-to-one  
521 regressions, although the variable ranking is not in the same. All components have been  
522 retained for the *E. coli* predictive model (Fig. 8), resulting in  $R^2$  equal to 0.66 and RMSE of  
523 1.66 log MPN 100 mL<sup>-1</sup> (Fig 8A). Using the three main explanatory variables only (S1  
524 Table),  $R^2$  still reaches 0.54, with a RMSE of 1.81 log MPN 100 mL<sup>-1</sup> (Fig 8B).

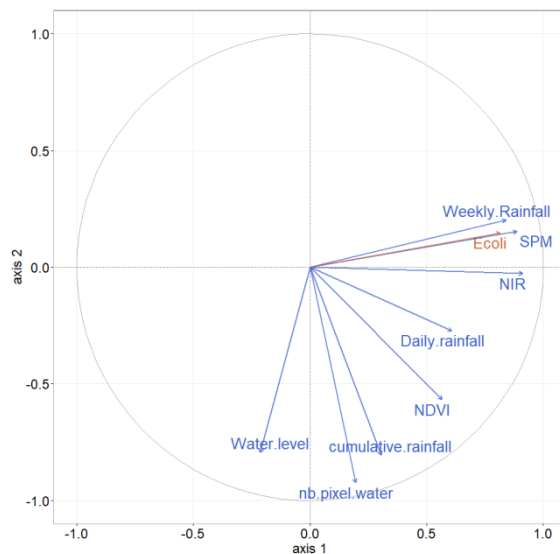

525  
526  
527  
528  
529

**Fig 7. Correlation circle of partial least squares (PLS) regression, illustrating relationships between predictor variables (blue), *E. coli* (orange) and the two first PLS components (first component on the x-axis, second one on the y-axis).**

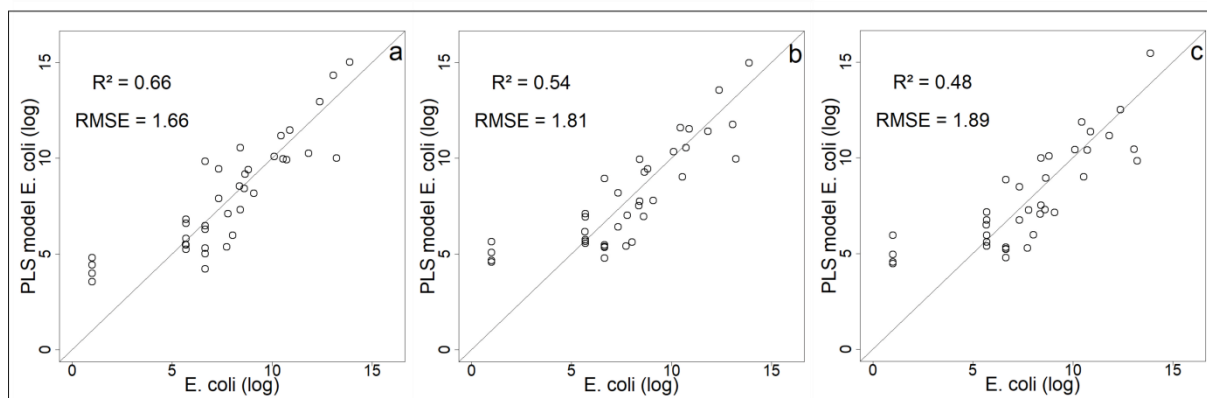

530  
531  
532  
533  
534  
535

**Fig 8. Comparison of models' predictions with observed *E. coli* (log values) (a) PLS model with all environmental variables and all components; (b) PLS model with NIR band, SPM and Weekly rainfall and all components; (c) PLS model with satellite variables only (NIR band and Weekly rainfall) and all components**

536 One of our objectives was to question the use of satellite data to monitor the dynamics of *E.*  
537 *coli* to investigate the potential of tele-epidemiological approaches. We therefore chose to  
538 perform a PLS regression retaining only the key satellite data (Weekly rainfall and the NIR  
539 band, S1 Table, Fig 7) which gave Eq. (1):

$$540 \quad E. coli = 4.376 + 0.024 \cdot \text{Weekly Rainfall} + 0.002 \cdot \text{NIR band} \quad (1)$$

541 where *E. coli* is expressed in log MPN 100 mL<sup>-1</sup>, Weekly Rainfall in mm, and NIR band in  
542 sr\*10000. The R<sup>2</sup> of this model is equal to 0.48 with a RMSE of 1.88 MPN 100 mL<sup>-1</sup> (Fig  
543 8C).

544 The model quality limits are linked to individuals 31 to 34 which correspond to the limit of  
545 detection of *E. coli* (less than 50 MPN 100mL<sup>-1</sup> for which it was arbitrarily decided to assign  
546 the value "1") (Fig 9). These very low values make the relationship between *E. coli*  
547 concentration and the explanatory variables nonlinear. If these data are removed, the quality  
548 of the model is improved (S2 Fig), highlighting that our models, whether complete or  
549 simplified, represent the dynamics of *E. coli* from February to mid-December (S3 Fig). In  
550 addition, it should be noted that if we assign the values of 49, 25, 10, 5 instead of 1 to values  
551 below 50 MPN 100mL<sup>-1</sup>, the results are better ( $R^2 = 0.8$ ,  $R^2 = 0.79$ ,  $R^2 = 0.76$ ,  $R^2 = 0.74$   
552 respectively, and RMSE = 0.98 MPN 100 mL<sup>-1</sup>, RMSE = 1.05 MPN 100 mL<sup>-1</sup>, RMSE=1.21  
553 MPN 100 mL<sup>-1</sup>, RMSE = 1.33 MPN 100 mL<sup>-1</sup> respectively, S2D, E, F, G Fig). Finally, the  
554 models (Fig 9 and S3 Fig) reproduce well the short (weekly) and long term (annual)  
555 variability of *E. coli*.

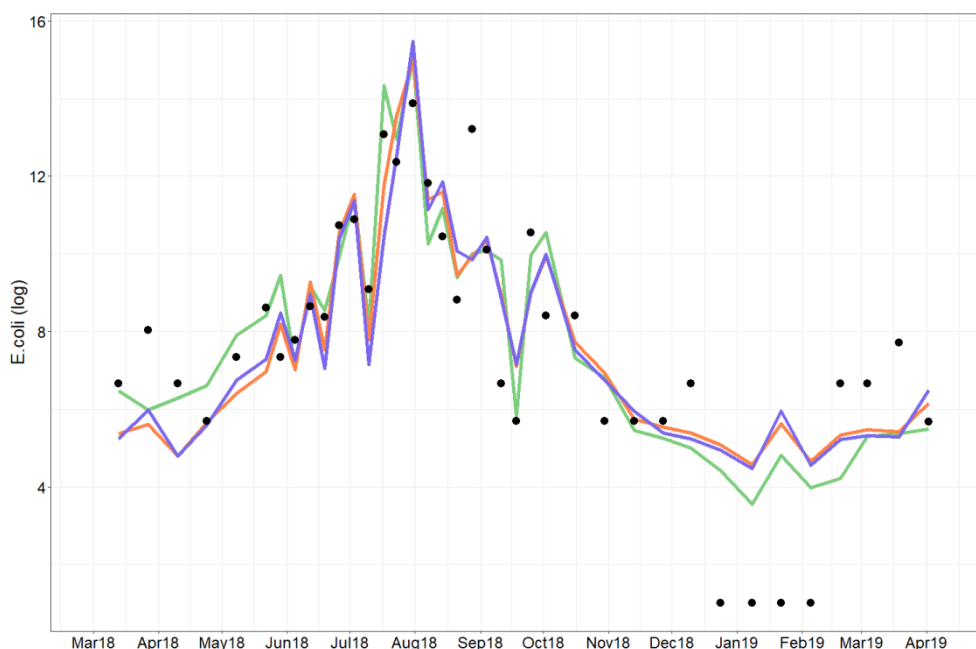

556  
557 **Fig 9. Observed *E. coli* (black point) and predicted *E. coli* (green line for all variables, orange line for NIR**  
558 **band, SPM and Rainfall variables, blue line for satellite variables**

559  
560

### 561 **Analysis of the diarrheal incidence and its temporal dynamics with *E. coli* and** 562 **environmental variables**

563 In 2018, diarrheal diseases (bloody diarrhea, non-bloody diarrhea, typhoid fever, dysentery)  
564 represent 27% of the consultations at HSPC and 11% in medical centers and hospitals in  
565 Burkina Faso (2018 statistical directory of Burkina Faso). It is the third cause of consultation.

566 In the Center-East region, these diseases correspond to 6% of the consultations in the HSPC  
567 and 1.7% in hospitals.

### 568 *Incidence of diarrheal diseases in the Kapore area*

569 When data from the Dierma, Lengha and Dango HSPCs are pooled together, diarrheal  
570 diseases are the third reason for consultation after malaria and respiratory infections. In 2018,  
571 children aged 1 to 4 years represented the majority of cases recorded in the 3 HSPC with  
572 39.1% of admissions, followed by children under one year (27.8%), then female adults  
573 (14.3%), children aged 5 to 14 years (12.2%), and finally male adults (6.6%). More precisely,  
574 at the health centers of Dierma and Dango, adults consulted the most, then children from 1  
575 year to 4 years of age, then those from 5 to 14 years of age, and finally those under the age of  
576 1 year. At the HSPC of Lengha, children aged 1 to 4 years represented the most of the  
577 consultations followed by adults, in particular women, children aged between 5 and 14 years,  
578 and children under the age of 1 year.

579 In 2018, non-bloody diarrhea (NBD) disease and dysentery constituted the majority of  
580 admissions with 62.3% and 34.4% respectively. There were a few cases of typhoid fever and  
581 bloody diarrhea. Whereas the HPSC of Dango reported mainly cases of dysentery, the HPSC  
582 of Lengha reported mainly cases of NBD disease as well as cases of dysentery. Similarly, the  
583 HPSC of Dierma reported mainly cases of NBD disease, although fewer than those recorded  
584 in Lengha. When the data from the 3 HPSCs for 2018 was pooled, a first peak was observed  
585 in February, this was followed by a decreasing trend in March and April that thereafter  
586 increased to reach a maximum in August after which the values decreased to a minimum in  
587 December-January (Fig 10). When observed individually by site, the data from the HPSC of  
588 Dango differed slightly from this bulk trend: the first peak occurs in April instead of  
589 February, and its minimum is in October. Finally, a time lag between the start of the increase  
590 and the main peak differed between HPSC: May and June-August for Dierma, June and  
591 August-September for Lengha, June and August for Dango.

592

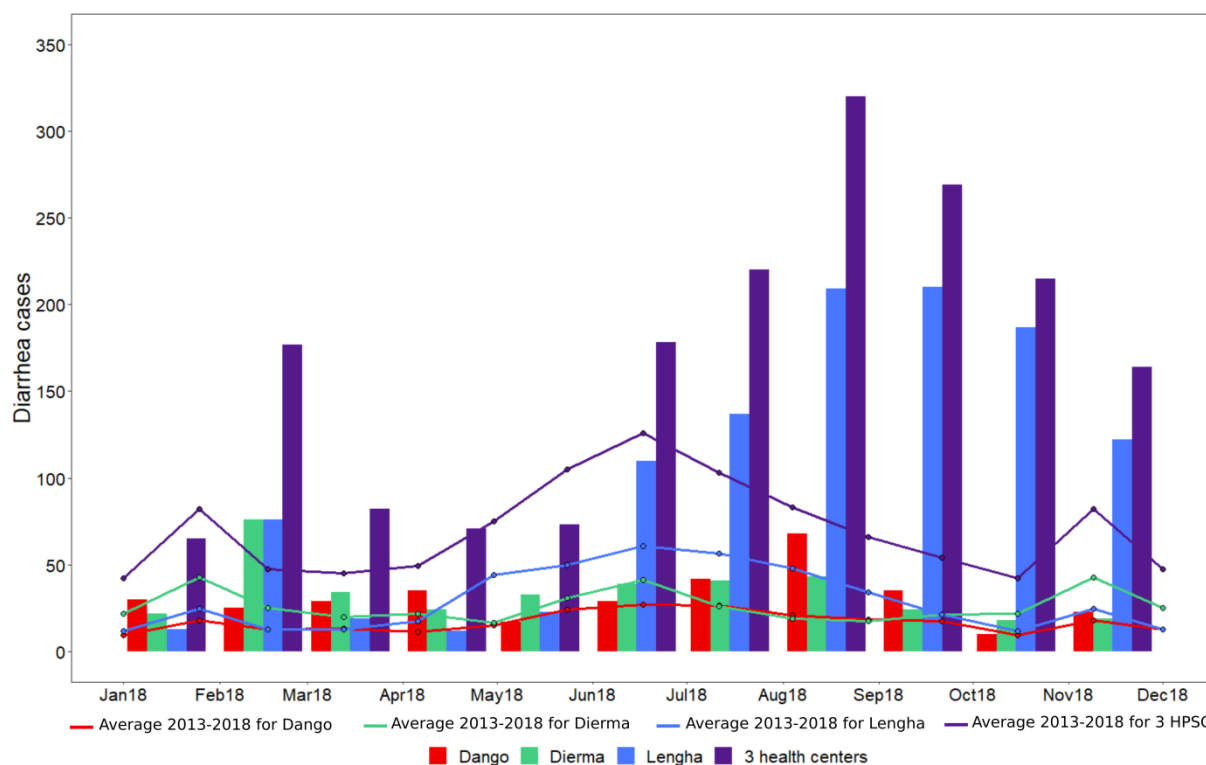

593  
 594 **Fig 10. Monthly incidence recorded in 2018-2019 and average recorded for the period 2013-2018 for the 3**  
 595 **HPSC (Dango, Dierma, Lengha) and for all of these 3 HPSC (for January-March 2019 only the data of the**  
 596 **HPSC of Dierma and Lengha were available)**  
 597

598 For the period 2013-2018, NBD and dysentery constituted the majority of admissions (57.7%  
 599 and 33.5% respectively) followed by typhoid fever and a few cases of bloody diarrhea. These  
 600 last two types of disease mainly concern Dierma.

601 The monthly average established for the period 2013-2018 reveals similar seasonal dynamics.  
 602 However, the number of cases was much higher in 2018, particularly for Lengha. Indeed,  
 603 2018 appears to be an exceptional year in terms of the number of cases recorded compared to  
 604 other years, especially for the period from June to November and in February.

605 The temporal dynamic over the period 2013-2018 is similar to that of 2018, although some  
 606 specificities can be observed. The average cycle of diarrhea cases for the period 2013-2018 of  
 607 the HPSC of Dango presents a less marked peak in August unlike 2018. Unlike 2018, the  
 608 second peak is observed in February rather than April, and the minimum is not in October but  
 609 in January. For Dierma, for the period 2013-2018 the minimum during the first half of the  
 610 year is observed in June and the maximum in August, whereas in 2018 they are in April and  
 611 from June to August, respectively. Finally, there are seasonal differences in the use of the  
 612 health center: consultations are higher in Lengha during the rainy season (56.2%) in contrast  
 613 to Dango (43.3%) and Dierma (37.7%).

614 For the period 2008-2018, when we report the number of cases of diarrhea in relation to the  
615 total population of each health area (S5 Fig), the numbers for Dierma are higher compared to  
616 Dango and Lengha, particularly during the dry season from January to May and to a lesser  
617 extent in August. Finally, for the year 2018-2019, Dango and Dierma have higher rates than  
618 Lengha from January 2018 to May 2018, in December 2018 and in February and March 2019,  
619 while Lengha has higher rates from June to November 2018 (S5 Fig).

### 620 ***Relationship between diarrhea incidence and environmental variables and E. coli***

621 The numbers *E. coli* and cases of diarrhea were significantly correlated over the period March  
622 2018 – March 2019 ( $r_s = 0.70$ , Table 2). There was also a significant correlation between  
623 diarrhea cases and SPM values ( $r_s = 0.72$ , Table 2) with a one-month lag between the peak of  
624 SPM in July and the peak of diarrhea cases in August. We also observed a significant  
625 correlation between diarrheal cases and precipitation ( $r_s = 0.71$ , Table 2) and diarrheal cases  
626 and surrounding land NDVI ( $r = 0.68$ , Table 2).

627 The seasonal dynamics were similar between April and December. A one-month lag between  
628 the peaks of NIR band and cases of diarrhea ( $r_s = 0.63$ ), occurring in July and August  
629 respectively, was observed similar to that observed for in-situ SPM (Fig 11).

630

631 **Table 2. Correlation coefficients obtained by regressing diarrhea incidence and *E. coli*, and diarrhea**  
632 **incidence and environmental variables over March 2018-March 2019**

| <b>Environmental and microbiological variables</b> | <b>Correlation</b> |
|----------------------------------------------------|--------------------|
| <i>E. coli</i>                                     | $r_s = 0.70^{**}$  |
| SPM                                                | $r_s = 0.72^{**}$  |
| Rainfall Kapore                                    | $r_s = 0.71^{**}$  |
| Surrounding land NDVI (wide area)                  | $r_s = 0.68^{**}$  |
| Number of water pixels                             | $r_s = 0.07$       |
| Water level                                        | $r_s = 0.23$       |
| Sentinel-2 NIR                                     | $r_s = 0.63^*$     |

633 \*corresponds to p-values < 0.05

634 \*\*corresponds to p-values < 0.01



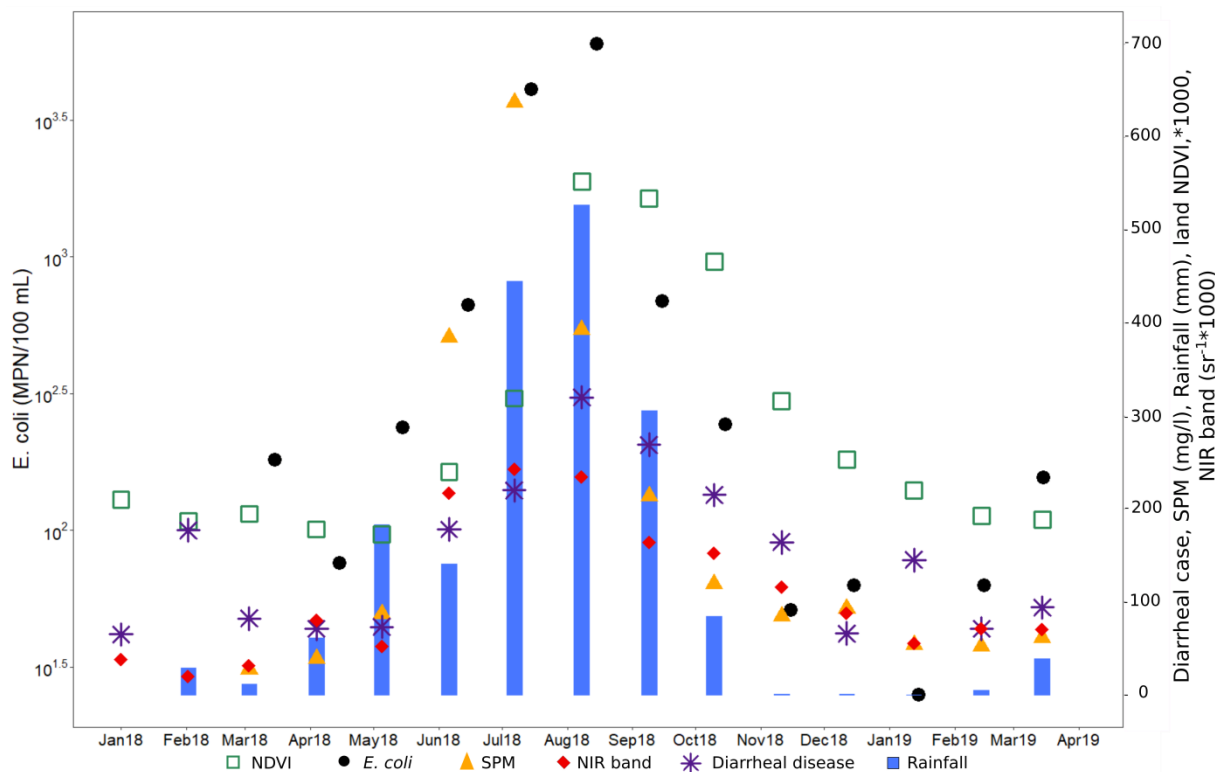

635  
 636 **Fig 11. Monthly average of SPM (mg / l), *E. coli* (MPN / 100mL), NIR band (sr<sup>-1</sup>\*1000) and land NDVI (\***  
 637 **1000), rainfall (mm), and cases of diarrhea for all 3 HPSC (Dierma, Lengha and Dango) over March 2018**  
 638 **- March 2019**

639  
 640 The first component of the PLS regression explains 78% of the variability of diarrhea cases  
 641 and the second one 2% (S4 Fig). Monthly rainfall, NIR band and *E. coli* are the main  
 642 explanatory variables of the first PLS component (explained variance above 70%, S2 Table,  
 643 Fig 12), and to a lesser extent the SPM and NDVI (explained variance equal to 68% and 67%  
 644 respectively, S2 Table, Fig 12). Compared to the results of the one-to-one regressions, the  
 645 PLS shows that the NIR band variable has a more important role than SPM, and that the  
 646 NDVI has a less important role. We decided to retain these 5 variables as the main  
 647 explanatory variable to set up the simplified model. As done for the *E. coli* analysis, all  
 648 components have been retained for the predictive models. When all the variables are retained,  
 649 the R<sup>2</sup> of the model is equal to 0.81 with an RMSE of 32.08 cases of diarrhea (Fig 13A and  
 650 Fig 14). When only the main explanatory variables are used (Monthly rainfall, NIR Band, *E.*  
 651 *coli*, SPM, and NDVI), the model presents an R<sup>2</sup> = 0.82 with an RMSE of 31.00 cases of  
 652 diarrhea (Fig 13B and Fig 14). The use of satellite data that best explain PLS component 1  
 653 variance (S2 Table, Fig 12) provides an R<sup>2</sup> = 0.76 and an RMSE = 35.14 (Fig 13C and Fig 14,  
 654 Eq. (2)) and the following model:

655 
$$\text{Cases of diarrhea} = 1.63 + 0.163 \cdot \text{Monthly rainfall} + 0.013 \cdot \text{NIR band} + 400.232 \cdot \text{NDVI} \quad (2)$$

656 where Monthly Rainfall is expressed in mm, NIR band in  $\text{sr}^{-1} * 10000$ , and NDVI and Cases of  
657 diarrhea are unitless.

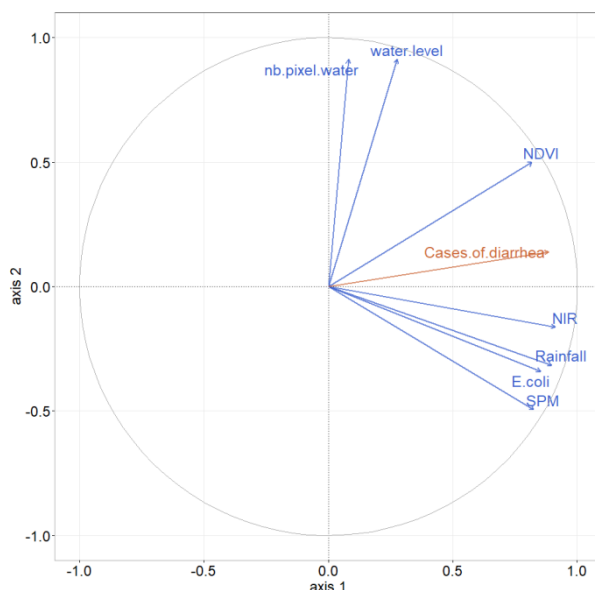

658  
659 **Fig 12. Correlation circle of partial least squares (PLS) regression, illustrating relationships between**  
660 **predictor variables (blue), cases of diarrhea (orange) and the two first PLS components (first component**  
661 **on the x-axis, second one on the y-axis ).**  
662

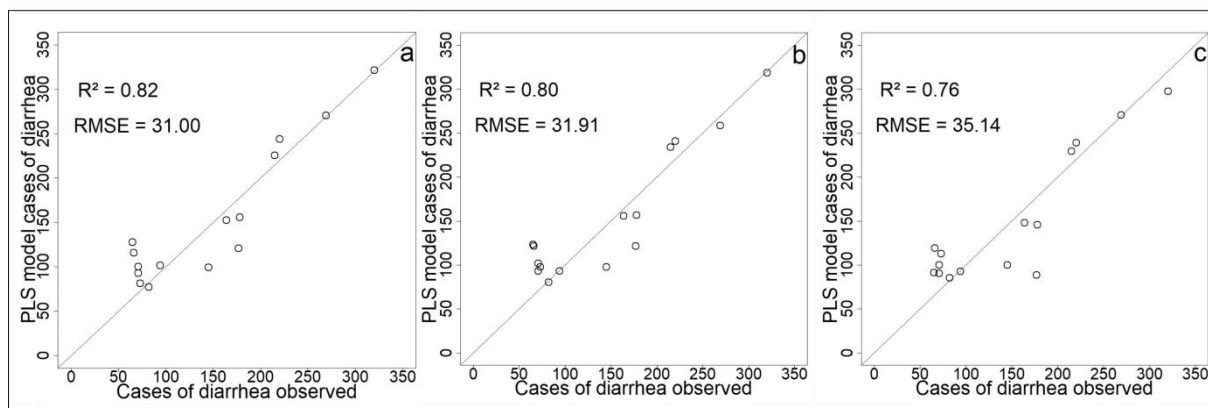

663  
664 **Fig 13. Comparison of models' predictions with cases of diarrhea observed (a) PLS model with all**  
665 **environmental variables; (b) PLS model with Monthly rainfall, SPM, *E. coli*, NIR Band, and NDVI; (c)**  
666 **PLS model with NIR band, NDVI and Monthly rainfall**

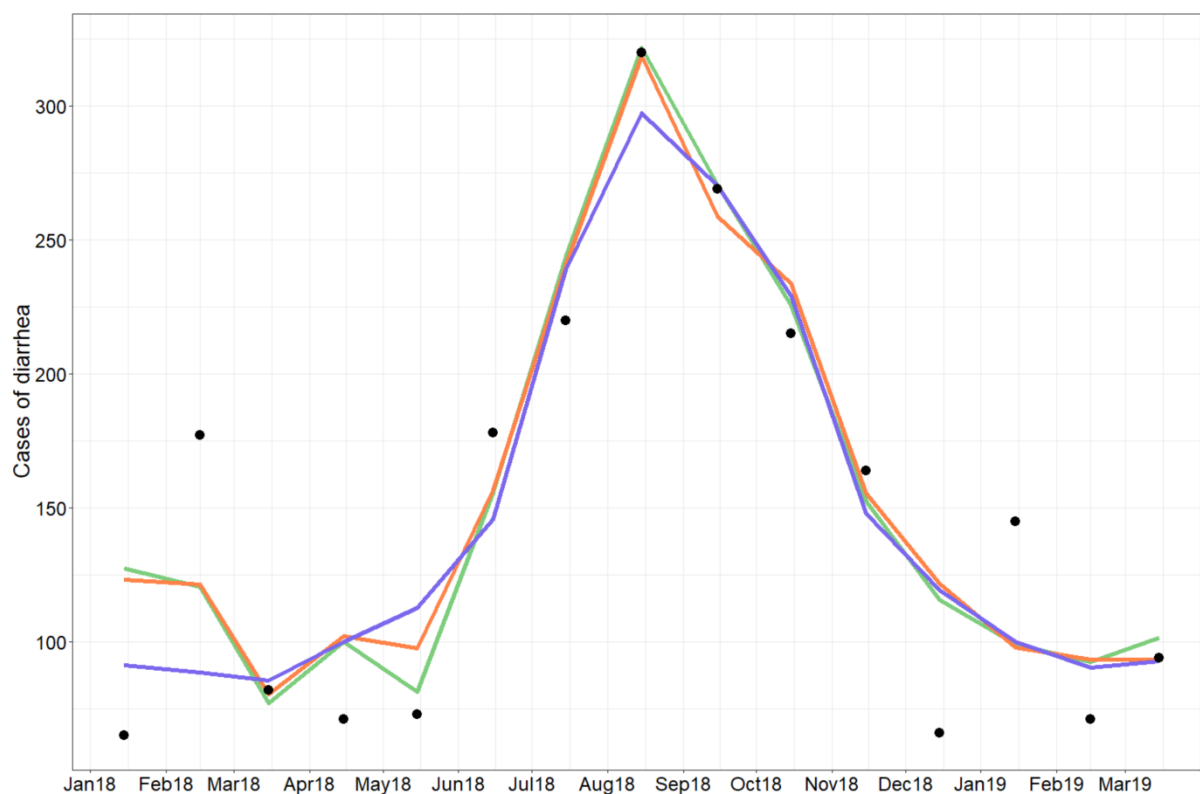

667  
668 **Fig 14. Observed diarrhea (black point) and predicted diarrhea cases using all variables (green line), NIR**  
669 **band, SPM, E.coli and rainfall variables (orange line) and only satellite variables (blue line)**

670

### 671 **Socio-health vulnerabilities**

672 The interviews revealed the different types of water supply used for domestic purposes:  
673 borehole, “puisard”, lake and / or tributary, and combinations of these different types of  
674 water. People, especially women, often need to draw water 2-3 times a day to fulfil the  
675 requirements of the household.

676

### 677 *Environmental and spatial vulnerabilities*

678 The first criterion of vulnerability is environmental. The evolution of the vegetation cover  
679 during the year being similar for the 3 health areas, the environmental vulnerability is mainly  
680 linked to the direct proximity to surface water, including Bagre Lake. Thus the higher number  
681 of cases of diarrhea recorded at the Dierma health center could be linked to the fact that this  
682 health area has the most inhabited areas (Dierma village, Zella, Kapore Peul) in close  
683 proximity to surface water (Fig 1). The population would therefore be in contact with surface  
684 water (microbiological hazard) all year round, and particularly so in July and August. This  
685 situation concerns also Fulani settlements near Lengha (Ouazi Peul, Yakala and Yakala Peul).

686 This vulnerability linked to the proximity to surface water, increases with distance from  
687 drinking water points and with the use of “puisard” for part of the year. This mainly concerns  
688 the Fulani settlements, in particular Ouazi Peul, as well as certain sectors of Kapore Peul and  
689 Yakala Peul, located far from boreholes or wells. *"I use the water from the lake when I don't*  
690 *have time to go to the borehole"*, explained a woman working on a vegetable field (Kapore  
691 Peul), and *"the majority goes to the lake or dig 'puisards'"* at Ouazi Peul. This situation is  
692 aggravated during the rainy season when access to a borehole becomes difficult: the tracks are  
693 less passable, and rivers are full of water, forcing people to bypass them. Moreover,  
694 temporary streams and ponds located in proximity to the habitations lead to direct use of  
695 surface water, or to digging of “puisards”, thus increasing the use of this type of non-potable  
696 water at this time of year. During a so-called “normal rainfall year”, the populations living far  
697 from boreholes mainly use the lake between December (the backwaters and tributaries are dry  
698 from December-January) and June. Both “puisards” and the lake or the tributaries close to the  
699 habitations are used in July and November, with mainly the “puisards” being used between  
700 August and October. “Puisards” are often dug close to where people live. The water quality is  
701 considered to be better than that of the lake: *"puisards make people less sick"* (B.A, Yakala  
702 Peul), *"water from the puisards is better than that of the lake"* (D.M, Ouazi Peul). Indeed, the  
703 *E. coli* values observed in the “puisards” are lower: at Kapore “puisard” the values are 480  
704 MPN 100 mL<sup>-1</sup> without rain and 3 300 MPN 100 mL<sup>-1</sup> after rain; in comparison, the values on  
705 the Kapore routine site in the Bagre lake at the same dates were equal to 5300 and 15000  
706 MPN 100 mL<sup>-1</sup>. Nevertheless, *E. coli* numbers are still high for a water source used for  
707 drinking water.

708 Distance also plays a role in vulnerability in terms of access to healthcare. The Lengha HSPC  
709 action plan in 2018 reveals that 41.5% of the population resides between 5 and 10 km,  
710 including some populations of Ouazi and Zamsé Peul, and 8% at more than 10 km, mainly  
711 Yakala Peul, which limits access to healthcare. Moreover, these difficulties in accessing  
712 healthcare are accentuated during the rainy season. The data collected from the action plans of  
713 the HSPC in Dierma reveal that from July to December 37.11% of the population had  
714 difficulty in accessing the HSPC due to the river that crosses the village (Fig 1B).

715

716 This form of vulnerability concerns Yakala Peul, Ouazi Peul, Kapore Peul, especially those  
717 living far from potable water points, and to a lesser extent Zamsé Peul and the Zella district of  
718 Dierma.

719

720

721 ***Social vulnerability***

722 The lack of financial resources is also a vulnerability criterion for access to water and  
723 healthcare. Access to drinking water may be subject to charging: in Dierma it is 500 FCFA /  
724 woman / concession, and in Zamsé Peul it is 5000 FCFA / year. The lack of financial  
725 resources can therefore lead some people to use the water from the lake: "*this is why we are*  
726 *going to draw water from the lake*" (B.D). The issue of the cost of care, between 1500 and  
727 5000 FCFA, can also be a limiting factor. Financial difficulties can lead to self-medication or  
728 the late arrival of some people at the HSPC with conditions "*often more serious and*  
729 *complicated to treat*" (nurse of the HSPC in Lengha). The possibility that the HSPC accepts  
730 or refuses credit varies between respondents. Financial availability varies according to the  
731 type of activities and the harvest sales periods: for example, for those who practice market  
732 gardening there is more money available in November-December and in February-May.  
733 Finally, activity type can also be a criterion of socio-health vulnerability. Pastoral activity can  
734 limit access to potable water. Similarly, some farmers cultivate fields far from their  
735 concession, forcing them to use surface water like those in the Banoma district of Dierma.

736

737 Access to water and healthcare also depends on social and political relations inherited from  
738 recent local history, in particular that linked to land use policies as well as rights on the  
739 various resources (water, land) and associated conflicts. In our study region, the pastoral  
740 populations remain particularly vulnerable in terms of access to drinking water and  
741 healthcare. For instance, Fulani herders and farmers are subject to different public policies: no  
742 health center and few drinking water points are available for the Fulani. Recently, 100  
743 concessions of the Fulani of Yakala were displaced because the inhabitants of Lengha needed  
744 more land. The resulting increase in the distance from the Fulani concessions to borehole and  
745 the HSPC of Lengha also increased their socio-health vulnerabilities. The Fulani remain  
746 subject to subjugation and power relations. This form of vulnerability therefore concerns  
747 mainly the Fulani settlements, people cultivating distant fields and the poorest section of the  
748 population.

749

750 In summary, the epidemiological study and the interviews revealed five criteria of  
751 vulnerability: 1) proximity to surface waters and the distance to a potable water point and  
752 health center; 2) financial difficulties; 3) age: children who are more fragile and who drink  
753 surface water while playing; 4) type of activities: shepherds who leave their habitation with

754 drinkable water and then drink water from the lake, and some people who cultivate on fields  
755 far from concessions; 5) population in a situation of subjugation.

756

### 757 **The microbiological health risk and its particularity in 2018**

758 The microbiological health risk associated with diarrheal diseases is higher during the rainy  
759 season. The values of *E. coli* are the highest, the use of surface water is more important  
760 (closer and easier to access relative to the pumps for people living far from the villages),  
761 access to health centers is more difficult (impassable roads, less financial availability). This  
762 risk is reinforced for the Fulani by the territorial organization and the associated power  
763 relations.

764 The number of cases of diarrhea was higher in 2018 suggesting that the risk was even higher  
765 that year. The low rainfall recorded in 2017 resulted in an exceptional decrease in surface  
766 water during the following dry season: water level was 228.16 m on 18 July 2018, compared  
767 to 230.154 m on 16 July 2017 and 231.456 m on 20 July 2019). Water level returned to  
768 normal at the end of July (230.184 m on 28 July 2018 compared to 230.519 m on 26 July  
769 2017 and 232.736 on 30 July 30 2019). The scarcity of water at the end of the dry season  
770 probably has also negatively impacted the water level of the aquifers provoking a reduction in  
771 water flows from the borehole and the breakdown of the pumps. Populations usually using  
772 borehole or pump water may have had to use water from the lake or dig “puisards” near the  
773 lake. Difficulty to access to drinking water and to dig ‘puisards’ coupled to environmental  
774 parameters could explain the exceptional number of diarrhea cases observed in 2018, with the  
775 exception of Dierma.

776

## 777 **Discussion**

### 778 **Dynamics of *E. coli* in relation to environmental parameters**

779 We have shown that water at the Kapore site is polluted by bacteria of fecal origin throughout  
780 the year, with higher values observed during the rainy season. Our *E. coli* numbers are within  
781 the range of values found by Akrong et al. [86] in the Bosomtwe Lake in Ghana (*E. coli*  
782 ranging from <1 to 5400 cfu / 100ml and for enterococci from <1 to 8400) and by Tyner et al.  
783 [87] in Lake Malawi (*E. coli* range from 0 to 21200 cfu / 100 ml).

784

785 We also observed a significant relationship between *E. coli* and enterococci, with some  
786 variations with time. This relation is in line with data from the Democratic Republic of Congo  
787 ( $R^2 = 0.94$ , [88]) and Hawaii ( $R^2=0.72-0.87$ , [89]). However, we also observed some outliers  
788 for two groups of data points. The first group, characterized by high *E.coli* and low  
789 enterococci during the period from March to mid-June, may be linked to a phase of  
790 resuspension of particle-attached *E. coli* that had previously sedimented, potentially during  
791 periods of disturbance, such as when animal are drinking in the lake. The second group (mid-  
792 September and late November-early December) is characterised by low *E. coli* and high  
793 enterococci. Higher values of enterococci are often associated with fresh fecal matter as  
794 enterococci are considered to have more restrictive nutrient requirements than *E. coli* and to  
795 have a lower capacity of survival in the environment [90-92]. It is therefore probable that this  
796 second group of points corresponds to the presence of recent inputs of fecal matter. Recent  
797 work from Alberta, Canada [93] also noted that enterococci were not suitable for the  
798 assessment of irrigation water quality. Given the overall good relationship between *E. coli* and  
799 enterococci and the questions on the use of enterococci as an indicator of fecal contamination  
800 in tropical systems, we have focused the analysis and the following discussion on the  
801 relationship between *E. coli* and the environmental parameters. Nevertheless, a more in depth  
802 investigation on the use of enterococci as a FIB in tropical surface waters for the evaluation of  
803 the risk to human health would not be a miss.

804

805 We observed significant positive correlations between *E. coli* and precipitation and in situ  
806 SPMs. High intensities of convective rainfall in this area, when vegetation is not yet fully  
807 developed and when erodible material is present, create surface runoff that is likely to  
808 transport SPM as well as bacteria towards the Bagre Reservoir. Other studies [94, 39, 95]  
809 have also observed positive correlations between *E. coli* concentrations and precipitation and  
810 suggested that this relationship was due to contamination of the soil surface by bacteria of  
811 fecal origin from animal husbandry and open defecation. Indeed, in rural areas in Burkina  
812 Faso in 2017, 63% of people were supposed to be concerned by open defecation due to the  
813 lack of latrines [5]. During precipitation events, this matter is transported via runoff to  
814 downstream water bodies. Therefore, this type of diffuse source is often a more important  
815 source of fecal contamination during the rainy season than during the dry season. Finally, in  
816 addition to being transported down slopes, as is the case for SPM, *E. coli* could also have

817 local point sources (livestock, open defecation near the routine point) which may explain  
818 some of the high values observed (for example at the beginning and at the end of August).

819  
820 The link between precipitation, land use and erosion, SPM and *E. coli* concentrations has been  
821 observed elsewhere. In tropical environments, Nakhle et al. [96] in the Mekong basin in Lao  
822 PDR observed that concentrations of *E. coli* are positively correlated with total suspended  
823 sediment (TSS) concentrations, particularly in watersheds subject to soil erosion. Petersen and  
824 Hubbart [97] in an Appalachian watershed of West Virginia (USA) found a strong positive  
825 relationship between SPM and *E. coli* that was strongly related to the percentage of  
826 agricultural land. A similar relationship between land use, SPM and *E. coli* was also observed  
827 by Tong and Chen [98] working in the State of Ohio. Poor microbial water quality is often  
828 associated with high relative percentages of cultivated land in both tropical and temperate  
829 regions [99-100]. The watershed of the Bagre Reservoir has undergone profound changes  
830 since the 1980s with an increase in cultivated areas and bare soils to the detriment of natural  
831 vegetation [67, 68, 101], which may have resulted in increased erosion and particle transport  
832 towards the lake. This type of land use can also alter the size of the particles [102] leading to  
833 increases in the proportion below 5 $\mu$ m [103]. This smaller fraction is known to be correlated  
834 with *E. coli* [97] and can extend the survival of bacteria in organic carbon rich environments  
835 [104]. Indeed, particle size distribution, determined from three water samples from the Bagre  
836 Reservoir in 2017 using a particle size analyzer Partica LA-950V2, has a bimodal structure  
837 with very fine particles (0.2-0.5 $\mu$ m and 1.2-13.2 $\mu$ m) which may have exerted an impact on  
838 the presence and survival of *E. coli*. More generally, the presence of these very fine particles  
839 is probably linked to characteristics of the soil type in this region as they have also been  
840 observed in the Agoufou region (Mali) [75].

841  
842 We observed a lag of about 15 days between the peak of SPM and *E.coli* in the summer. The  
843 period (end of July - beginning of August) corresponds to a period of high vegetation cover.  
844 Vegetation cover, and particularly riparian vegetation, plays a strong role in filtering overland  
845 flow and reducing soil, and probably bacteria, downslope transport [105]. In this context, the  
846 time lag between the peaks of SPM and *E. coli* may be explained by the conjunction of  
847 several phenomena: 1) the remobilization/resuspension of bacteria in mud during flooding of  
848 the river banks (Fig 6E): satellite images show that the main flooding of the banks took place  
849 between 11<sup>th</sup> and 31<sup>st</sup> July 2018 (Fig 15); and 2) the presence of ideal conditions for the  
850 development of bacteria. Indeed, as the sampling point was close to the banks, bacteria at this



851 time of the year can be considered to be in an environment conducive to their development:  
852 protection against UV and support by the presence of SPM, but also presence of  
853 sediment/sludge rich in carbon, and nutrients. SPM is known to increase the availability of  
854 nutrients and organic matter and provides some protection from light exposure [106-107] and  
855 *E.coli* often have higher growth and survival rates when associated with SPM [22, 108]. Thus,  
856 the flooding of the banks with the remobilization of bacteria present in the mud, the increase  
857 in the survival rate, and their higher relative proportion in the attached fraction (and as such  
858 protected from light exposure by the presence of SPM) may well explain this time lag  
859 between the peaks of SPM and *E. coli*.

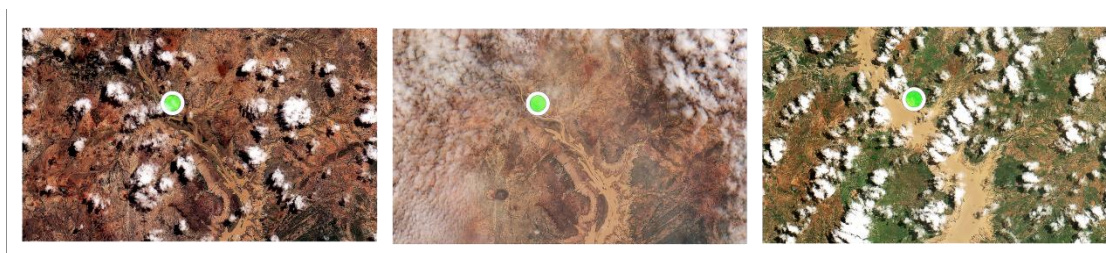

860  
861 **Fig 15. Evolution of the surface water area in the region of the routine measurement during the month of**  
862 **July 2018 (from left to right: Sentinel-2 images from 01/07/2018, 11/07/2018 and 31/07/2018)**

863  
864 Ultimately, the use of satellite data represents a major challenge with a very cost-effective  
865 way of predicting the dynamics of *E. coli* via the characterization and monitoring of  
866 environmental determinants such as SPM, land-use, and precipitation. Previous work has  
867 shown the importance of using landscape data from satellite images to characterize water  
868 quality, such as Johnson et al. [109] and Hua [110], and to monitor SPM dynamics [75, 78].  
869

### 870 **Relationship between diarrhea incidence, environmental variables and *E. coli***

871 Diarrhea case incidence shows a marked seasonality with a main peak during the rainy season  
872 and a second during the dry season. Such positive associations have been also observed  
873 between cases of diarrhea and rainfall in Ghana [111] and during the peak monsoon rainfall  
874 months in the Philippines [112], Bangladesh [113] and Lao PDR [26]. In addition, we show  
875 that the increase in *E. coli* is associated with an increase in cases of diarrhea similar to what  
876 has previously been observed in a river in Botswana [114]. We did not find any link with *E.*  
877 *coli* or the environmental parameters for the second peak in January-February. Nitiema et al.  
878 [115] as well as Bonkougou et al. [116] found a stronger presence of rotavirus between  
879 December and February-March in Burkina Faso and Mwenda et al. [117] also report that, in  
880 several African countries, the prevalence of rotavirus peaked during the cool, dry months.

881 Therefore, it is possible that rotavirus, and not *E. coli*, was responsible for the secondary peak  
882 in diarrhea cases. Moreover, the NIR band reflectance data miss the peak of diarrhea linked to  
883 rotavirus. If the cooler winter months (December to February) are excluded, the monthly  
884 cases of diarrhea are strongly correlated with the NIR band data ( $R^2 = 0.83^{**}$ ).

885

### 886 **Predictive models of *E. coli* and cases of diarrhea**

887 Few studies have reported predictive models using independent variables to explain *E. coli*  
888 concentration and of these, the majority concern temperate areas e.g. [118-119]. Some recent  
889 studies have looked at this question in tropical areas of Asia [120, 96]. Common with our  
890 study, these other works use turbidity or/and Total Suspended Solid (TSS) associated with  
891 other environmental variables. The model suggested by Chen and Chang [118] includes  
892 antecedent precipitation, stream temperature, and TSS concentration, and gives an  $R^2$  of 0.60  
893 for the Johnson catchment, which is moderately urbanized. Hamilton and Luffman [119] used  
894 a multiple regression with an  $R^2$  of 0.57 to predict *E. coli* in the Little River (Tennessee, USA)  
895 using antecedent precipitation, discharge and turbidity. Boithias et al. [120] used also a model  
896 to predict *E. coli* concentrations including TSS and discharge with an  $R^2$  of 35.3%. Nakhle et  
897 al. [96] used PLS regression and highlighted that *E. coli* was mainly explained by areal  
898 percentages of unstocked forest, turbidity and TSS. Our model retaining the most significant  
899 variables (NIR, precipitation, SPM) and the one based on satellite data (NIR and  
900 precipitation) present similar results with an  $R^2 = 0.54$  and an  $R^2 = 0.48$  respectively (without  
901 individuals below the detection threshold of *E. coli*:  $R^2 = 71$  and  $R^2 = 60$  respectively). In  
902 future research, it would be interesting to also integrate water temperature and discharge into  
903 the regression.

904 There are many studies that highlight the link between diarrhea incidence and meteorological  
905 parameters such as rainfall [52, 43-44, 121]. More specifically in Sub-Saharan Africa, both  
906 Alexander et al [114] in Bostwana, and Alemayehu et al [122] in Ethiopia highlighted this  
907 relationship. However, to our knowledge, the study presented here is the first to illustrate the  
908 link between diarrhea incidence and satellite-derived variables. Some explaining variables  
909 probably have causal links with diarrhea cases (*E. coli* and rainfall for instance), while others  
910 may only show spurious correlation (NDVI probably). At this stage, the monthly time-step  
911 and the well-marked seasonal cycle of different variables prevents more conclusions to be  
912 drawn. A possible time-lag between SPM, NIR and cases of diarrhea cases may impact the  
913 correlation value given. The number of data is too small to give solid evidences so far,

914 although such a lag is expected because of delays in contaminants peak, contamination, and  
915 consultations in health center.

916 The validity of these models over several years and their capability to predict interannual  
917 variability will have to be assessed in further studies.

918

### 919 **Epidemiology and socio-health vulnerabilities**

920 In Dierma and Dango, consultations are more frequent in the dry season than in the rainy  
921 season. This is probably linked to the agricultural calendar and to the fact that the inhabitants  
922 of Dierma, and to a lesser extent of Dango, cultivate crops on the other side of the lake.  
923 Ouedraogo and Janin [66] also observed seasonal differences in the use of healthcare for all  
924 pathologies in the region studied.

925

926 Our interviews highlight a more important use of surface water during the rainy season. This  
927 is due to the easier accessibility and availability of surface water as opposed to borehole  
928 water, similar to the conclusions of Schweitzer et al. [64] for Burkina Faso. In future research,  
929 it would be interesting to determine the proportion of people using the different types of water  
930 (lake, other surface water, “puisard”) and to investigate the seasonality of FIB and SPM  
931 across a wider range of water surface points including a more comprehensive investigation of  
932 the “puisards”.

933

934 Distance and financial availability can be limits for seeking healthcare. This is in line with  
935 results by Haddad et al. [63], who have shown that people living more than 10km away from  
936 a health center went less to health facilities: 25% went there on the 7th day of the illness  
937 against 40% for those living at less than 10km. Haddad et al. [63] also revealed that the  
938 maximum cost envisaged to pay for treatment for a family member is 2537 FCFA in rural  
939 areas. However, in our study region, the cost varies between 1500 and 5000 FCFA, which can  
940 further limit the use of care. Finally, our interviews revealed that financial availability for  
941 treatment varies according to the harvest sales periods in agreement with Schweitzer et al.  
942 [64].

943

944 Social, physical and financial inequalities, problems of marginality and power imbalances  
945 also play an important role in determining access to water resources and health care [123-  
946 125]. They are therefore important determinants of socio-health vulnerabilities. Regarding

947 access to water, this refers to "political ecology" which "*recognizes that access and control*  
948 *over resources, including water, are rooted in local stories and social relations*" [126- 127].  
949 Indeed, our interviews reveal that the notions of territory, marginality, and social exclusion  
950 shape the landscape of water resources. This theoretical framework can also be extended to  
951 include access to care. Thus, social and political interactions between resource managers and  
952 health actors on the one hand and potential users on the other hand are often very limited.  
953 This is particularly the case for marginal populations such as the Fulani [128, 7, 129]. These  
954 socially constructed and politically imposed inequalities lead to an unequal distribution of  
955 access and use of water and health care, as Dinko et al. [127] has shown in Ghana.

956  
957 Ultimately, the socio-health vulnerabilities and therefore the associated health risks observed  
958 in our study region combine social, political and physical factors. The study of the health risk  
959 linked to diarrheal diseases requires an interdisciplinary analysis using both qualitative and  
960 quantitative methods. However, these approaches are still rare as already pointed out by  
961 Batterman et al. [130].

962  
963 Finally, we would like to underline the limits of this case study. Our study concerns a small  
964 region (120 km<sup>2</sup>) with a single in-situ monitoring point over one year and some occasional  
965 measurements in "puisard". We have only monthly data on diarrhea cases from 3 health  
966 centers, and interviews with inhabitants of the 3 villages, Fulani settlements in the area and  
967 health personnel. It would be interesting to have a longer time series of data and to conduct a  
968 quantitative vulnerability survey. Despite these limitations, our work allowed to 1) test  
969 hypotheses on the link between *E. coli*, environmental variables and cases of diarrhea in a  
970 tropical context, 2) develop a simple prediction model for *E. coli* from variables that can be  
971 estimated using satellite data; 3) propose a first step in the interdisciplinary analysis of the  
972 health risk by combining environmental, microbiological, epidemiological data and  
973 interviews.

## 974 **Conclusion**

975 This study highlighted the positive correlation between *E. coli* and enterococci in tropical  
976 rural West Africa with higher numbers observed during the rainy season. *E. coli* and diarrheal  
977 diseases were strongly correlated with precipitation, in-situ SPM, and reflectance in the NIR  
978 band between February and mid-December implying that satellite data can provide an

979 important input to water quality monitoring. Such a tele-epidemiological approach that  
980 incorporates environmental, microbiological and epidemiological variables is of particular  
981 interest in regions where in-situ measurements are absent or scarce and where the impacts of  
982 global and local change (land use change, modifications in precipitation) are most strongly  
983 felt.

984 In the study area, diarrheal diseases represent the 3rd cause of consultation, with children  
985 under 5 years old the most impacted. The vulnerability of the population depends on income,  
986 age, activity, and worsens during the rainy season due to reduced accessibility to drinking  
987 water and healthcare in conjunction with increased proximity of water sources of poor quality.  
988 The importance of the power relations, which have a direct consequence on the territorial  
989 organization for access to water and healthcare, were also highlighted. Overall, the  
990 microbiological health risk associated with diarrheal diseases is more important during the  
991 rainy season from June to September. Therefore intervention through public  
992 education/awareness should be increased as the rainy season approaches.

993 Cross-referencing of data from interviews and environmental parameters helped to clarify the  
994 causes of the large number of cases of diarrhea in 2018, illustrating the importance of  
995 interdisciplinary approaches. In order to have a more detailed understanding of the processes  
996 and interactions at play, it will be necessary in the future to investigate the co-variability of  
997 environmental, microbiological and epidemiological data over finer timescales and longer  
998 periods. This should be coupled with a more in depth quantitative survey (large number of  
999 interviews) to obtain a complete vision of health issues related to fecal contamination over the  
1000 whole Bagre area through an EcoHealth approach.

1001 Although this is an initial case study, this work provides is a first step in the interdisciplinary  
1002 analysis of health risk. The approach proposed here provides a base for developing future  
1003 programs that explicitly integrate global, social and human mechanisms that modify habitats,  
1004 modes of transmission, pathogen survival, and ecosystem functioning, as well as access to  
1005 drinking water and healthcare. It is only by explicitly recognizing the complexity of the  
1006 problem and by adopting a more equitable approach to problem solving that we can hope to  
1007 provide solutions and to improve the livelihoods of the affected populations in Burkina Faso  
1008 and elsewhere.

1009

## 1010 **Acknowledgements**

1011 The authors thank Ali Niaoné for the field measurements, Marielle Gosset for advice on  
1012 precipitation datasets, Bruno Lartiges for discussion on bacteria-particle characteristics,

1013 Kpeke Nestor Kambiré and Yasmina Karambiri for collecting part of the health data and part  
1014 of the location of village concessions, boreholes and wells, and the regional health office of  
1015 Tenkodogo for the use of its premises.

1016

## 1017 **References :**

- 1018 1. Global Health Estimates 2016: Deaths by Cause, Age, Sex, by Country and by Region, 2000–2016. Geneva,  
1019 World Health Organization; 2018.
- 1020 2. Troeger C, Blacker B.F, Khalil I.A, Rao P.C, Cao S, Zimsen S.R.M, et al. Estimates of the Global, Regional, and  
1021 National Morbidity, Mortality, and Aetiologies of Diarrhoea in 195 Countries: A Systematic Analysis for the  
1022 Global Burden of Disease Study 2016. *The Lancet Infectious Diseases*. 2018; 18, 11: 1211-28.  
1023 [https://doi.org/10.1016/S1473-3099\(18\)30362-1](https://doi.org/10.1016/S1473-3099(18)30362-1).
- 1024 3. Roth G.A, Abate D, Abate K.H, Abay S.M, Abbafati C, Abbasi N, et al. Global, Regional, and National Age-  
1025 Sex-Specific Mortality for 282 Causes of Death in 195 Countries and Territories, 1980–2017: A Systematic  
1026 Analysis for the Global Burden of Disease Study 2017. *The Lancet*. 2018; 392, 10159: 1736-88.  
1027 [https://doi.org/10.1016/S0140-6736\(18\)32203-7](https://doi.org/10.1016/S0140-6736(18)32203-7).
- 1028 4. WHO/UNICEF. Progress on Sanitation and Drinking Water: 2015 Update and MDG Assessment. WHO/Unicef,  
1029 Geneva. 2015. [http://apps.who.int/iris/bitstream/10665/177752/1/9789241509145\\_eng.pdf](http://apps.who.int/iris/bitstream/10665/177752/1/9789241509145_eng.pdf).
- 1030 5. JMP. Progress on household drinking water, sanitation and hygiene 2000-2017. Special focus on inequalities.  
1031 New York: United Nations Children’s Fund (UNICEF) and World Health Organization (WHO). 2019.  
1032 Available from: [https://www.who.int/water\\_sanitation\\_health/publications/jmp-report-2019/en/](https://www.who.int/water_sanitation_health/publications/jmp-report-2019/en/)
- 1033 6. Giné Garriga R., Pérez Foguet A. Water, Sanitation, Hygiene and Rural Poverty: Issues of Sector Monitoring  
1034 and the Role of Aggregated Indicators. *Water Policy*. 2013; 15, 6: 1018-45.  
1035 <https://doi.org/10.2166/wp.2013.037>.
- 1036 7. Pezon C, Nansi J, Bassono R. De l’accès aux systèmes de distribution d’eau potable à l’accès aux services d’eau  
1037 potable : méthode et outils, IRC Centre International de l’Eau et de l’Assainissement. 2012, Available from:  
1038 [https://www.ircwash.org/resources/de-l-e2%80%99acc-c3%A8s-aux-syst-c3%A8mes-de-distribution-](https://www.ircwash.org/resources/de-l-e2%80%99acc-c3%A8s-aux-syst-c3%A8mes-de-distribution-d-e2%80%99eau-potable-c3%A0-l-e2%80%99acc-c3%A8s-aux-services-d-e2%80%99eau-potable)  
1039 [d-e2%80%99eau-potable-c3%A0-l-e2%80%99acc-c3%A8s-aux-services-d-e2%80%99eau-potable](https://www.ircwash.org/resources/de-l-e2%80%99acc-c3%A8s-aux-services-d-e2%80%99eau-potable).
- 1040 8. Mitchell D.O, Starzyk M.H. Survival of *Salmonella* and Other Indicator Microorganisms. *Canadian Journal of*  
1041 *Microbiology*. 1975; 21, 9: 1420-21. <https://doi.org/10.1139/m75-212>.
- 1042 9. Schaffter N, Parriaux A. Pathogenic-Bacterial Water Contamination in Mountainous Catchments. *Water*  
1043 *Research*. 2002; 36, 1: 131-39. [https://doi.org/10.1016/S0043-1354\(01\)00242-1](https://doi.org/10.1016/S0043-1354(01)00242-1).
- 1044 10. Jokinen C.C, Schreier H, Mauro W, Taboada E, Isaac-Renton J.L, Topp E, et al. The Occurrence and Sources  
1045 of *Campylobacter* Spp., *Salmonella enterica* and *Escherichia Coli* O157:H7 in the Salmon River, British  
1046 Columbia, Canada. *Journal of Water and Health*. 2010; 8, 2: 374-86. <https://doi.org/10.2166/wh.2009.076>.
- 1047 11. Edberg S.C., Rice E.W, Karlin R.J, Allen M.J. *Escherichia Coli*: The Best Biological Drinking Water Indicator  
1048 for Public Health Protection. *Journal of Applied Microbiology*. 2000; 88, S1: 106S-116S.  
1049 <https://doi.org/10.1111/j.1365-2672.2000.tb05338.x>.

- 1050 12. Kay D, Bartram J, Prüss A, Ashbolt N, Wyer M.D, Fleisher J.M, et al. Derivation of Numerical Values for the  
1051 World Health Organization Guidelines for Recreational Waters. *Water Research*. 2004; 38, 5: 1296-1304.  
1052 <https://doi.org/10.1016/j.watres.2003.11.032>.
- 1053 13. Health Canada, Ottawa (Ontario) Guidelines for Canadian drinking water quality, Guideline technical  
1054 document - *Escherichia coli*, 2020. Available from [https://www.canada.ca/en/health-](https://www.canada.ca/en/health-canada/services/publications/healthy-living/guidelines-canadian-drinking-water-quality-guideline-technical-document-escherichia-coli.html)  
1055 [canada/services/publications/healthy-living/guidelines-canadian-drinking-water-quality-guideline-technical-](https://www.canada.ca/en/health-canada/services/publications/healthy-living/guidelines-canadian-drinking-water-quality-guideline-technical-document-escherichia-coli.html)  
1056 [document-escherichia-coli.html](https://www.canada.ca/en/health-canada/services/publications/healthy-living/guidelines-canadian-drinking-water-quality-guideline-technical-document-escherichia-coli.html)
- 1057 14. WHO. Guidelines for Drinking-Water Quality, 4th ed.; World Health Organisation: Geneva, 2017.
- 1058 15. Walk S.T, Alm E.W, Calhoun L.M, Mladonicky J.M, Whittam T.S. Genetic Diversity and Population Structure  
1059 of *Escherichia Coli* Isolated from Freshwater Beaches. *Environmental Microbiology*. 2007; 9, 9: 2274-88.  
1060 <https://doi.org/10.1111/j.1462-2920.2007.01341.x>.
- 1061 16. Ishii S, Sadowsky M.J. *Escherichia Coli* in the Environment: Implications for Water Quality and Human  
1062 Health. *Microbes and Environments*. 2008; 23, 2: 101-8. <https://doi.org/10.1264/jsme2.23.101>.
- 1063 17. Balière C. Les *Escherichia coli* potentiellement pathogènes dans l'environnement littoral : cas des STEC et des  
1064 EPEC. Thesis, University of Bretagne occidentale – Brest. 2016. Available from: [https://tel.archives-](https://tel.archives-ouvertes.fr/tel-01505750)  
1065 [ouvertes.fr/tel-01505750](https://tel.archives-ouvertes.fr/tel-01505750)
- 1066 18. Jang J, Hur H-G, Sadowsky MJ, Byappanahalli M.N, Yan T, Ishii S. Environmental *Escherichia Coli* : Ecology  
1067 and Public Health Implications-a Review. *Journal of Applied Microbiology*. 2017; 123, 3: 570-81.  
1068 <https://doi.org/10.1111/jam.13468>.
- 1069 19. Winfield M.D, Groisman E.A. Role of Nonhost Environments in the Lifestyles of *Salmonella* and *Escherichia*  
1070 *Coli*. *Applied and Environmental Microbiology*. 2003; 69, 7: 3687-94.  
1071 <https://doi.org/10.1128/AEM.69.7.3687-3694.2003>
- 1072 20. Solo-Gabriele H.M., Wolfert M.A, Desmarais T.R, Palmer C.J. Sources of *Escherichia Coli* in a Coastal  
1073 Subtropical Environment. *Applied and Environmental Microbiology*. 2000; 66, 1: 230-37.  
1074 <https://doi.org/10.1128/AEM.66.1.230-237.2000>.
- 1075 21. Isobe K.O, Tarao M, Chiem N.H, Minh Le Y, Takada H. Effect of Environmental Factors on the Relationship  
1076 between Concentrations of Coprostanol and Fecal Indicator Bacteria in Tropical (Mekong Delta) and  
1077 Temperate (Tokyo) Freshwaters. *Applied and Environmental Microbiology*. 2004; 70, 2: 814-21.  
1078 <https://doi.org/10.1128/AEM.70.2.814-821.2004>.
- 1079 22. Troussellier M, Got P, Bouvy M, M'Bouy M, Arfi R, Lebihan F, et al. Water Quality and Health Status of the  
1080 Senegal River Estuary. *Marine Pollution Bulletin*. 2004; 48, 9-10: 852-62.  
1081 <https://doi.org/10.1016/j.marpolbul.2003.10.028>.
- 1082 23. Mushi D, Byamukama D, Kirschner A.K.T, Mach R.L, Brunner K, Farnleitner A.H. Sanitary Inspection of  
1083 Wells Using Risk-of-Contamination Scoring Indicates a High Predictive Ability for Bacterial Faecal  
1084 Pollution in the Peri-Urban Tropical Lowlands of Dar Es Salaam, Tanzania. *Journal of Water and Health*.  
1085 2012; 10, 2: 236-43. <https://doi.org/10.2166/wh.2012.117>.
- 1086 24. Kumpel E Cock-Esteb A, Duret M, de Waal D, Khush R. Seasonal Variation in Drinking and Domestic Water  
1087 Sources and Quality in Port Harcourt, Nigeria. *The American Journal of Tropical Medicine and Hygiene*.  
1088 2017; 96, 2: 437-45. <https://doi.org/10.4269/ajtmh.16-0175>.

- 1089 25. Kilungo A, Powers L, Arnold N, Whelan K, Paterson K, Young D. Evaluation of Well Designs to Improve  
1090 Access to Safe and Clean Water in Rural Tanzania. *International Journal of Environmental Research and*  
1091 *Public Health*. 2018; 15, 1: 64. <https://doi.org/10.3390/ijerph15010064>.
- 1092 26. Boithias L, Choisy M, Souliyaseng N, Jourden M, Quet F, Buisson Y, et al. Hydrological Regime and Water  
1093 Shortage as Drivers of the Seasonal Incidence of Diarrheal Diseases in a Tropical Montane Environment.  
1094 *PLOS Neglected Tropical Diseases*. 2016 ; 10,12. <https://doi.org/10.1371/journal.pntd.0005195>.
- 1095 27. Ribolzi O, Evrard O, Huon S, Rochelle-Newall E, Henri-des-Tureaux T, Silvera N, et al. Use of Fallout  
1096 Radionuclides (7Be, 210Pb) to Estimate Resuspension of Escherichia Coli from Streambed Sediments during  
1097 Floods in a Tropical Montane Catchment. *Environmental Science and Pollution Research*. 2016 ; 23, 4:  
1098 3427-35. <https://doi.org/10.1007/s11356-015-5595-z>.
- 1099 28. Rochelle-Newall E, Nguyen T.M.H, Le T.P.Q, Sengtaheuanghoung Q, Ribolzi O. A short review of fecal  
1100 indicator bacteria in tropical aquatic ecosystems: knowledge gaps and future directions. *Frontiers in*  
1101 *Microbiology*. 2015; 6. <https://doi.org/10.3389/fmicb.2015.00308>.
- 1102 29. Muirhead R.W, Collins R.P, Bremer P.J. Erosion and Subsequent Transport State of Escherichia Coli from  
1103 Cowpats. *Applied and Environmental Microbiology*. 2005; 71, 6: 2875-79.  
1104 <https://doi.org/10.1128/AEM.71.6.2875-2879.2005>.
- 1105 30. Oliver D.M, Clegg C.D, Heathwaite A.L, Haygarth P.M. Preferential Attachment of Escherichia Coli to  
1106 Different Particle Size Fractions of an Agricultural Grassland Soil. *Water, Air, and Soil Pollution*. 2007; 185,  
1107 1-4: 369-75. <https://doi.org/10.1007/s11270-007-9451-8>.
- 1108 31. Brock T.D. *Principles of microbial ecology*. Prentice-Hall, NJ, 1966.
- 1109 32. Stotzky G. Influence of clay minerals on microorganisms: iii. effect of particle size, cation exchange capacity,  
1110 and surface area on bacteria. *Canadian Journal of Microbiology*. 1966; 12, 6: 1235-46.  
1111 <https://doi.org/10.1139/m66-165>.
- 1112 33. Tombes A.S, Abernathy A.R, Welch D.M, Lewis S.A. The Relationship between Rainfall and Nematode  
1113 Density in Drinking Water. *Water Research*. 1979; 13, 7: 619-22. [https://doi.org/10.1016/0043-](https://doi.org/10.1016/0043-1354(79)90009-5)  
1114 [1354\(79\)90009-5](https://doi.org/10.1016/0043-1354(79)90009-5).
- 1115 34. Hoff J.C, Geldreich E.E. Comparison of the biocidal efficiency of alternative disinfectants, *J. Am. Water*  
1116 *Works Assoc*. 1981: 40-44.
- 1117 35. Levy K, Hubbard A.E, Nelson K.L, Eisenberg J.N.S. Drivers of Water Quality Variability in Northern Coastal  
1118 Ecuador. *Environmental Science & Technology*. 2009; 43, 6: 1788-97. <https://doi.org/10.1021/es8022545>.
- 1119 36. Causse J, Billen G, Garnier J, Henri-des-Tureaux T, Olasa X, Thammahacksa C, et al. Field and Modelling  
1120 Studies of Escherichia Coli Loads in Tropical Streams of Montane Agro-Ecosystems. *Journal of Hydro-*  
1121 *Environment Research*. 2015; 9, 4: 496-507. <https://doi.org/10.1016/j.jher.2015.03.003>.
- 1122 37. Nguyen H.T.M, Le Q.T.P, Garnier J, Janeau J-L, et Rochelle-Newall E. Seasonal Variability of Faecal  
1123 Indicator Bacteria Numbers and Die-off Rates in the Red River Basin, North Viet Nam. *Scientific Reports*.  
1124 2016; 6, 1: 21644. <https://doi.org/10.1038/srep21644>.
- 1125 38. Rochelle-Newall E.J, Ribolzi O, Viguier M, Thammahacksa C, Silvera N, Latschack K, et al. Effect of Land  
1126 Use and Hydrological Processes on Escherichia Coli Concentrations in Streams of Tropical, Humid  
1127 Headwater Catchments. *Scientific Reports*. 2016 ; 6, 1: 32974. <https://doi.org/10.1038/srep32974>.



- 1128 39. Abia A.L.K, Ubomba-Jaswa E, Momba M.N.B. Impact of Seasonal Variation on Escherichia Coli  
1129 Concentrations in the Riverbed Sediments in the Apies River, South Africa. *Science of The Total*  
1130 *Environment*. 2015; 537: 462-69. <https://doi.org/10.1016/j.scitotenv.2015.07.132>.
- 1131 40. Cronin A.A, Breslin N, Gibson J, Pedley S. Monitoring Source and Domestic Water Quality in Parallel with  
1132 Sanitary Risk Identification in Northern Mozambique to Prioritise Protection Interventions. *Journal of Water*  
1133 *and Health*. 2006; 4, 3: 333-45. <https://doi.org/10.2166/wh.2006.029>.
- 1134 41. Musa HA, Shears P, Kafi S, Elsabag S.K. Water Quality and Public Health in Northern Sudan: A Study of  
1135 Rural and Peri-Urban Communities. *Journal of Applied Microbiology*. 1999; 87, 5: 676-82.  
1136 <https://doi.org/10.1046/j.1365-2672.1999.00907.x>.
- 1137 42. Effler P, Isaäcson M, Arntzen L, Heenan R, Canter P, Barrett T, et al. Factors Contributing to the Emergence of  
1138 *Escherichia coli* O157 in Africa. *Emerging Infectious Diseases*. 2001; 7, 5: 812-19.  
1139 <https://doi.org/10.3201/eid0705.017507>.
- 1140 43. Kulinkina A.V, Mohan V.R, Francis M.R, Kattula D, Sarkar R, Plummer J.D, et al. Seasonality of Water  
1141 Quality and Diarrheal Disease Counts in Urban and Rural Settings in South India. *Scientific Reports*. 2016;  
1142 6, 1: 20521. <https://doi.org/10.1038/srep20521>.
- 1143 44. Horn L, Hajat A, Sheppard L, Quinn C, Colborn J, Zermoglio M, et al. Association between Precipitation and  
1144 Diarrheal Disease in Mozambique . *International Journal of Environmental Research and Public Health*.  
1145 2018; 15, 4: 709. <https://doi.org/10.3390/ijerph15040709>.
- 1146 45. Checkley W. Effects of Acute Diarrhea on Linear Growth in Peruvian Children. *American Journal of*  
1147 *Epidemiology*. 2003; 157, 2: 166-75. <https://doi.org/10.1093/aje/kwf179>.
- 1148 46. Hashizume M, Armstrong B, Hajat S, Wagatsuma Y, Faruque A.S, Hayashi T, et al. Association between  
1149 Climate Variability and Hospital Visits for Non-Cholera Diarrhoea in Bangladesh: Effects and Vulnerable  
1150 Groups. *International Journal of Epidemiology*. 2007; 36, 5: 1030-37. <https://doi.org/10.1093/ije/dym148>.
- 1151 47. Phung D, Huang C, Rutherford S, Chu C, Wang X, Nguyen M, et al. Association between Climate Factors and  
1152 Diarrhoea in a Mekong Delta Area. *International Journal of Biometeorology*. 2015; 59, 9: 1321-31.  
1153 <https://doi.org/10.1007/s00484-014-0942-1>.
- 1154 48. Kondo H, Seo N, Yasuda T, Hasizume M, Koido Y, Ninomiya N, Yamamoto Y. Post-Flood — Infectious  
1155 Diseases in Mozambique. *Prehospital and Disaster Medicine*. 2002; 17, 3: 126-33.  
1156 <https://doi.org/10.1017/S1049023X00000340>.
- 1157 49. Hashizume M, Wagatsuma Y, Faruque A.S.G, Hayashi T, Hunter P.R, Armstrong B, et al. Factors Determining  
1158 Vulnerability to Diarrhoea during and after Severe Floods in Bangladesh. *Journal of Water and Health*. 2008;  
1159 6, 3: 323-32. <https://doi.org/10.2166/wh.2008.062>.
- 1160 50. Levy K, Woster A.P, Goldstein R.S, Carlton E.J. Untangling the Impacts of Climate Change on Waterborne  
1161 Diseases: A Systematic Review of Relationships between Diarrheal Diseases and Temperature, Rainfall,  
1162 Flooding, and Drought. *Environmental Science & Technology*. 2016; 50, 10: 4905-22.  
1163 <https://doi.org/10.1021/acs.est.5b06186>.
- 1164 51. Findley S.E, Doumbia S, Medina D.C, Guindo B, Toure M.B, Sogoba N, et al. Season-Smart: How Knowledge  
1165 of Disease Seasonality and Climate Variability Can Reduce Childhood Illnesses in Mali. IUSSP XXV  
1166 International Population Conference, Tours, France, 18-23 Juillet 2005 Session 905: Climate, population and

- 1167 health. Organiser: Deborah Balk. Available from:  
1168 [https://www.researchgate.net/publication/267970717\\_Season-](https://www.researchgate.net/publication/267970717_Season-smart_How_Knowledge_of_Disease_Seasonality_and_Climate_Variability_Can_Reduce_Childhood_Illnesses_in_Mali)  
1169 [smart How Knowledge of Disease Seasonality and Climate Variability Can Reduce Childhood Illness](https://www.researchgate.net/publication/267970717_Season-smart_How_Knowledge_of_Disease_Seasonality_and_Climate_Variability_Can_Reduce_Childhood_Illnesses_in_Mali)  
1170 [es in Mali](https://www.researchgate.net/publication/267970717_Season-smart_How_Knowledge_of_Disease_Seasonality_and_Climate_Variability_Can_Reduce_Childhood_Illnesses_in_Mali)
- 1171 52. Carlton EJ, Eisenberg J.N.S, Goldstick J, Cevallos W, Trostle J, Levy K. Heavy Rainfall Events and Diarrhea  
1172 Incidence: The Role of Social and Environmental Factors. *American Journal of Epidemiology*. 2014; 179, 3:  
1173 344-52. <https://doi.org/10.1093/aje/kwt279>.
- 1174 53. Dunn, Gillian, et Glen D. Johnson. « The Geo-Spatial Distribution of Childhood Diarrheal Disease in West  
1175 Africa, 2008–2013: A Covariate-Adjusted Cluster Analysis ». *Spatial and Spatio-Temporal Epidemiology* 26  
1176 (août 2018): 127-41. <https://doi.org/10.1016/j.sste.2018.06.005>.
- 1177 54. Dunn, Gillian, Glen D. Johnson, Deborah L. Balk, et Grace Sembajwe. « Spatially Varying Relationships  
1178 between Risk Factors and Child Diarrhea in West Africa, 2008-2013 ». *Mathematical Population Studies* 27,  
1179 n° 1 (2 janvier 2020): 8-33. <https://doi.org/10.1080/08898480.2019.1592638>.
- 1180 55. Elsas J.D.V, Semenov A.V, Costa R, Trevors J.T. Survival of Escherichia Coli in the Environment:  
1181 Fundamental and Public Health Aspects. *The ISME Journal*. 2011; 5, 2: 173-83.  
1182 <https://doi.org/10.1038/ismej.2010.80>.
- 1183 56. Carlton E.J, Woster A.P, DeWitt P, Goldstein R.S, Levy K. A Systematic Review and Meta-Analysis of  
1184 Ambient Temperature and Diarrhoeal Diseases. *International Journal of Epidemiology*. 2016; 45, 1: 117-30.  
1185 <https://doi.org/10.1093/ije/dyv296>.
- 1186 57. Kolstad E.W, Johansson K.A. Uncertainties Associated with Quantifying Climate Change Impacts on Human  
1187 Health: A Case Study for Diarrhea. *Environmental Health Perspectives*. 2011; 119, 3: 299-305.  
1188 <https://doi.org/10.1289/ehp.1002060>.
- 1189 58. Rochelle-Newall E, Pierret A, Boithias L, Ribolzi O, Robert E. « Accès à l'eau, usages des terres et dégradation  
1190 des sols : un triptyque qui favorise l'émergence des maladies diarrhéiques », in Désertification et système  
1191 terre: De la (re)connaissance à l'action, Editor: Liaison Énergie-Francophonie numéro 105 - 2ème trimestre  
1192 2017, Publisher: Jean-Pierre Ndoutoum, Editors: Institut de la Francophonie pour le Développement Durable  
1193 (IFDD), 2017. pp.83-85.
- 1194 59. Mercandalli, S. & Losch, B., eds. 2018. Une Afrique rurale en mouvement. Dynamiques et facteurs des  
1195 migrations au sud du Sahara. Rome, FAO et CIRAD. 60 p.
- 1196 60. Dos Santos, S., E.A. Adams, G. Neville, Y. Wada, A. de Sherbinin, E. Mullin Bernhardt, et S.B. Adamo.  
1197 « Urban Growth and Water Access in Sub-Saharan Africa: Progress, Challenges, and Emerging Research  
1198 Directions ». *Science of The Total Environment* 607-608 (décembre 2017): 497-508.  
1199 <https://doi.org/10.1016/j.scitotenv.2017.06.157>.61. Peretti-Watel P. Sociologie du risque, Armand Colin,  
1200 2000.
- 1201 62. Birkmann J, Wisner B. Measuring the un-measurable, the challenge of vulnerability. 2006. Available from:  
1202 <http://www.ehs.unu.edu/file/get/3962>
- 1203 63. Haddad S, Nougara A, Ridde V. Les inégalités d'accès aux services de santé et leurs déterminants au Burkina  
1204 Faso. *Santé, Société et Solidarité*. 2004 ; 3, 2: 199-210. <https://doi.org/10.3406/oss.2004.1012>.

- 1205 64. Schweitzer R, Pezon C, Pinjari A, Fonseca C, Mihelcic J.R. Household expenditure on water service. Financial  
1206 and economic expenditures of rural and peri-urban households across socio-economic classes and seasons in  
1207 Burkina Faso, 2013. Available from: [https://www.ircwash.org/resources/household-expenditure-water-](https://www.ircwash.org/resources/household-expenditure-water-service-financial-and-economic-expenditures-rural-and-peri)  
1208 [service-financial-and-economic-expenditures-rural-and-peri](https://www.ircwash.org/resources/household-expenditure-water-service-financial-and-economic-expenditures-rural-and-peri)
- 1209 65. Few R, Lake I, Hunter P.R, Tran P.G. Seasonality, Disease and Behavior: Using Multiple Methods to Explore  
1210 Socio-Environmental Health Risks in the Mekong Delta. *Social Science & Medicine*. 2013; 80: 1-9.  
1211 <https://doi.org/10.1016/j.socscimed.2012.12.027>.
- 1212 66. Ouédraogo F.C, Janin P. Transformations agraires et nouvelles mobilités autour d'un grand barrage (Bagré  
1213 Burkina Faso). *Cahiers Agricultures*. 2004; 13: 311-320. Available from:  
1214 <https://revues.cirad.fr/index.php/cahiers-agricultures/article/view/30450/0>
- 1215 67. Robert E. Le fleuve Nakambé et le réservoir de Bagré : facteurs explicatifs des recompositions territoriales et  
1216 des mobilités villageoises agraires et sanitaires en Pays Bissa (Burkina Faso). *Vertigo*. 2011; 10.  
1217 <https://doi.org/10.4000/vertigo.11459>.
- 1218 68. Robert E. Assessing and Understanding the Environmental Changes in the Doubegue Watershed (Burkina  
1219 Faso) by Combining Temporal Study of Land Use Changes and Stakeholders' Knowledge. *The Geographical*  
1220 *Journal*. 2017; 183, 1: 97-111. <https://doi.org/10.1111/geoj.12169>.
- 1221 69. Grim J.A, Knievel J.C, Crosman E.T. Techniques for Using MODIS Data to Remotely Sense Lake Water  
1222 Surface Temperatures. *Journal of Atmospheric and Oceanic Technology*. 2013; 30, 10: 2434-51.  
1223 <https://doi.org/10.1175/JTECH-D-13-00003.1>.
- 1224 70. Hurley M.A, Roscoe M.E. Automated Statistical Analysis of Microbial Enumeration by Dilution Series.  
1225 *Journal of Applied Bacteriology*. 1983; 55, 1: 159-64. <https://doi.org/10.1111/j.1365-2672.1983.tb02660.x>.
- 1226 71. Tan M, Duan Z. Assessment of GPM and TRMM Precipitation Products over Singapore. *Remote Sensing*.  
1227 2017; 9, 7: 720. <https://doi.org/10.3390/rs9070720>.
- 1228 72. Wang W, Lu H, Zhao T, Jiang L, Shi J. Evaluation and Comparison of Daily Rainfall From Latest GPM and  
1229 TRMM Products Over the Mekong River Basin. *IEEE Journal of Selected Topics in Applied Earth*  
1230 *Observations and Remote Sensing*. 2017; 10, 6: 2540-49. <https://doi.org/10.1109/JSTARS.2017.2672786>.
- 1231 73. Fang J, Yang W, Luan Y, Du J, Lin A, Zhao L. Evaluation of the TRMM 3B42 and GPM IMERG Products for  
1232 Extreme Precipitation Analysis over China. *Atmospheric Research*. 2019; 223: 24-38.  
1233 <https://doi.org/10.1016/j.atmosres.2019.03.001>.
- 1234 74. Schwatke C, Dettmering D, Bosch W, Seitz F. DAHITI – an Innovative Approach for Estimating Water Level  
1235 Time Series over Inland Waters Using Multi-Mission Satellite Altimetry. *Hydrology and Earth System*  
1236 *Sciences*. 2015; 19, 10: 4345-64. <https://doi.org/10.5194/hess-19-4345-2015>.
- 1237 75. Robert E, Kergoat L, Soumaguel N, Merlet S, Martinez J-M, Diawara M, et al. Analysis of Suspended  
1238 Particulate Matter and Its Drivers in Sahelian Ponds and Lakes by Remote Sensing (Landsat and MODIS):  
1239 Gourma Region, Mali. *Remote Sensing*. 2017; 9, 12: 1272. <https://doi.org/10.3390/rs9121272>.
- 1240 76. Hagolle O, Huc M, Villa Pascual D, Dedieu G. A multi-temporal method for cloud detection, applied to  
1241 FORMOSAT-2, VEN $\mu$ S, LANDSAT and SENTINEL-2 images. *Remote Sensing of Environment*. 2010;  
1242 114, 8: 1747-1755. <https://doi.org/10.1016/j.rse.2010.03.002>.

- 1243 77. Hagolle O, Huc M, Villa Pascual D, Dedieu G. A Multi-Temporal and Multi-Spectral Method to Estimate  
1244 Aerosol Optical Thickness over Land, for the Atmospheric Correction of FormoSat-2, LandSat, VEN $\mu$ S and  
1245 Sentinel-2 Images. *Remote Sensing*. 2015; 7, 3: 2668-2691. <https://doi.org/10.3390/rs70302668>
- 1246 78. Robert E, Grippa M, Kergoat L, Pinet S, Gal L, Cochonneau G, et al. Monitoring Water Turbidity and Surface  
1247 Suspended Sediment Concentration of the Bagre Reservoir (Burkina Faso) Using MODIS and Field  
1248 Reflectance Data. *International Journal of Applied Earth Observation and Geoinformation*. 2016; 52: 243-51.  
1249 <https://doi.org/10.1016/j.jag.2016.06.016>.
- 1250 79. Robert E, Grippa M, Kergoat L, Martinez J-M, Pinet S, Somdecoste T, et al. Monitoring inland water turbidity:  
1251 contribution of Spot5 Take5 to health hazard monitoring in West Africa (Bagre Lake, Burkina Faso). *Proc.*  
1252 *Int. Conf., Living Planet Symposium 2016, ESA, 9-14 mai 2016, 7 pp* Available from:  
1253 [https://www.researchgate.net/publication/303471854\\_MONITORING\\_INLAND\\_WATER\\_TURBIDITY\\_C](https://www.researchgate.net/publication/303471854_MONITORING_INLAND_WATER_TURBIDITY_CONTRIBUTION_OF_SPOT5_TAKE5_TO_HEALTH_HAZARD_MONITORING_IN_WEST_AFRICA_BAGRE_LAKE_BURKINA_FASO)  
1254 [ONTRIBUTION\\_OF\\_SPOT5\\_TAKE5\\_TO\\_HEALTH\\_HAZARD\\_MONITORING\\_IN\\_WEST\\_AFRICA\\_B](https://www.researchgate.net/publication/303471854_MONITORING_INLAND_WATER_TURBIDITY_CONTRIBUTION_OF_SPOT5_TAKE5_TO_HEALTH_HAZARD_MONITORING_IN_WEST_AFRICA_BAGRE_LAKE_BURKINA_FASO)  
1255 [AGRE\\_LAKE\\_BURKINA\\_FASO](https://www.researchgate.net/publication/303471854_MONITORING_INLAND_WATER_TURBIDITY_CONTRIBUTION_OF_SPOT5_TAKE5_TO_HEALTH_HAZARD_MONITORING_IN_WEST_AFRICA_BAGRE_LAKE_BURKINA_FASO).
- 1256 80. Chambers R, Conway G.R. Sustainable rural livelihoods: practical concepts for the 21st century, IDS discussion  
1257 paper 296. 1991
- 1258 81. Gaston Sanchez. plsdepot: Partial Least Squares (PLS) Data Analysis Methods. R package version 0.1.17. ,  
1259 2012; <https://CRAN.R-project.org/package=plsdepot>
- 1260 82. Tenenhaus M, Gauchi J-P, Ménardo C. Régression PLS et applications. *Revue de Statistique Appliquée*, 1995;  
1261 43, 1: 7-63.
- 1262 83. Wickham H (2016). *ggplot2: Elegant Graphics for Data Analysis*. Springer-Verlag New York. ISBN 978-3-  
1263 319-24277-4, <https://ggplot2.tidyverse.org>.
- 1264 84. USEPA. Recreational Water Quality Criteria. Office of Water, U.S. Environmental Protection Agency.  
1265 Washington, DC. 2012. Available from: [https://www.epa.gov/wqc/2012-recreational-water-quality-criteria-](https://www.epa.gov/wqc/2012-recreational-water-quality-criteria-documents)  
1266 [documents](https://www.epa.gov/wqc/2012-recreational-water-quality-criteria-documents)
- 1267 85. Wang J-J, Lu X.X, Liew S.C, Zhou Y. Retrieval of Suspended Sediment Concentrations in Large Turbid Rivers  
1268 Using Landsat ETM+: An Example from the Yangtze River, China. *Earth Surface Processes and Landforms*.  
1269 2009; 34, 8: 1082-92. <https://doi.org/10.1002/esp.1795>.
- 1270 86. Akrong M. O, Amu-Mensah F.K, Amu-Mensah M.A, Darko H, Addico G.N.D, Ampofo J.A. Seasonal  
1271 Analysis of Bacteriological Quality of Drinking Water Sources in Communities Surrounding Lake Bosomtwe  
1272 in the Ashanti Region of Ghana. *Applied Water Science* 2019; 9, 4: 82. [https://doi.org/10.1007/s13201-019-](https://doi.org/10.1007/s13201-019-0959-z)  
1273 [0959-z](https://doi.org/10.1007/s13201-019-0959-z).
- 1274 87. Tyner E.H, Jensen P, Ngochera M, Bootsma H.A Escherichia Coli (E. Coli) Distribution in the Lake Malawi  
1275 Nearshore Zone. *Journal of Great Lakes Research*. 2018; 44, 6: 1281-88.  
1276 <https://doi.org/10.1016/j.jglr.2018.10.011>.
- 1277 88. Nienie A.B, Sivalingam P, Laffite A, Ngelinkoto P, Otamonga J-P, Matand A, et al. Microbiological Quality of  
1278 Water in a City with Persistent and Recurrent Waterborne Diseases under Tropical Sub-Rural Conditions:  
1279 The Case of Kikwit City, Democratic Republic of the Congo. *International Journal of Hygiene and*  
1280 *Environmental Health*. 2017; 220, 5: 820-28. <https://doi.org/10.1016/j.ijheh.2017.03.011>.

- 1281 89. Goto D.K, Yan T. Effects of Land Uses on Fecal Indicator Bacteria in the Water and Soil of a Tropical  
1282 Watershed. *Microbes and Environments*. 2011; 26, 3: 254-60. <https://doi.org/10.1264/jsme2.ME11115>.
- 1283 90. Byappanahalli M.N, Shively D.A, Nevers M.B, Sadowsky M.J, Whitman R.L. Growth and Survival of  
1284 *Escherichia Coli* and Enterococci Populations in the Macro-Alga *Cladophora* (Chlorophyta) ». *FEMS*  
1285 *Microbiology Ecology*. 2003; 46, 2: 203-11. [https://doi.org/10.1016/S0168-6496\(03\)00214-9](https://doi.org/10.1016/S0168-6496(03)00214-9).
- 1286 91. Byappanahalli M.N, Yan T, Hamilton M.J, Ishii S, Fujioka R.S, Whitman R.L, et al. The Population Structure  
1287 of *Escherichia Coli* Isolated from Subtropical and Temperate Soils. *Science of the Total Environment*. 2012;  
1288 417-418: 273-79. <https://doi.org/10.1016/j.scitotenv.2011.12.041>.
- 1289 92. Byappanahalli M.N., Nevers M.B, Korajkic A, Staley Z.R, Harwood V.J. Enterococci in the Environment.  
1290 *Microbiology and Molecular Biology Reviews*. 2012; 76, 4: 685-706. [https://doi.org/10.1128/MMBR.00023-](https://doi.org/10.1128/MMBR.00023-12)  
1291 [12](https://doi.org/10.1128/MMBR.00023-12).
- 1292 93. Jokinen CC, Cook S.R, Reuter T, Tymensen L. Assessing Enterococci as an Alternative Fecal Indicator for  
1293 Irrigation Water Quality. *Agricultural Water Management*. 2020; 233: 106098.  
1294 <https://doi.org/10.1016/j.agwat.2020.106098>.
- 1295 94. An Y-J, Kampbell D.H, Peter Breidenbach G. *Escherichia Coli* and Total Coliforms in Water and Sediments at  
1296 Lake Marinas. *Environmental Pollution*. 2002; 120, 3: 771-78. [https://doi.org/10.1016/S0269-](https://doi.org/10.1016/S0269-7491(02)00173-2)  
1297 [7491\(02\)00173-2](https://doi.org/10.1016/S0269-7491(02)00173-2).
- 1298 95. Islam M.M.M, Hofstra N, Islam Md.A. The Impact of Environmental Variables on Faecal Indicator Bacteria in  
1299 the Betna River Basin, Bangladesh. *Environmental Processes*. 2017; 4, 2: 319-32.  
1300 <https://doi.org/10.1007/s40710-017-0239-6>.
- 1301 96. Nakhle, Paty, Olivier Ribolzi, Laurie Boithias, Sayaphet Rattanavong, Yves Auda, Saysongkham Sayavong,  
1302 Rosalie Zimmermann, et al. « Effects of Hydrological Regime and Land Use on In-Stream *Escherichia Coli*  
1303 Concentration in the Mekong Basin, Lao PDR ». *Scientific Reports* 11, n° 1 (décembre 2021): 3460.  
1304 <https://doi.org/10.1038/s41598-021-82891-0>.
- 1305 97. Petersen F, Hubbart J.A. Quantifying *Escherichia Coli* and Suspended Particulate Matter Concentrations in a  
1306 Mixed-Land Use Appalachian Watershed. *Water*. 2020; 12, 2: 532. <https://doi.org/10.3390/w12020532>.
- 1307 98. Tong S.T.Y, Chen W. Modeling the Relationship between Land Use and Surface Water Quality. *Journal of*  
1308 *Environmental Management*. 2002; 66, 4: 377-93. <https://doi.org/10.1006/jema.2002.0593>.
- 1309 99. Giri S, Qiu Z, Zhang Z. Assessing the Impacts of Land Use on Downstream Water Quality Using a  
1310 Hydrologically Sensitive Area Concept . *Journal of Environmental Management*. 2018; 213: 309-19.  
1311 <https://doi.org/10.1016/j.jenvman.2018.02.075>.
- 1312 100. Namugize J.N, Jewitt G, Graham M. Effects of Land Use and Land Cover Changes on Water Quality in the  
1313 UMngeni River Catchment, South Africa. *Physics and Chemistry of the Earth*. 2018; Parts A/B/C 105:  
1314 247-64. <https://doi.org/10.1016/j.pce.2018.03.013>.
- 1315 101. Cecchi P, Forkuor G, Cofie O, Lalanne F, Poussin J-C, Jamin J-Y. Small Reservoirs, Landscape Changes and  
1316 Water Quality in Sub-Saharan West Africa. *Water*. 2020; 12, 7: 1967. <https://doi.org/10.3390/w12071967>.
- 1317 102. Kellner E, Hubbart J.A. Improving Understanding of Mixed-Land-Use Watershed Suspended Sediment  
1318 Regimes: Mechanistic Progress through High-Frequency Sampling. *Science of The Total Environment*.  
1319 2017; 598: 228-38. <https://doi.org/10.1016/j.scitotenv.2017.04.052>.

- 1320 103. Kellner E, Hubbart J.A. Flow Class Analyses of Suspended Sediment Concentration and Particle Size in a  
1321 Mixed-Land-Use Watershed. *Science of The Total Environment*. 2019; 648: 973-83.  
1322 <https://doi.org/10.1016/j.scitotenv.2018.08.187>.
- 1323 104. Chandran A, Varghese S, Kandeler E, Thomas A, Hatha M, Mazumder A. An Assessment of Potential Public  
1324 Health Risk Associated with the Extended Survival of Indicator and Pathogenic Bacteria in Freshwater Lake  
1325 Sediments. *International Journal of Hygiene and Environmental Health*. 2011; 214, 3: 258-64.  
1326 <https://doi.org/10.1016/j.ijheh.2011.01.002>.
- 1327 105. Vigiak O, Ribolzi O, Pierret A, Sengtaheuanghoung O, Valentin C. Trapping efficiencies of cultivated and  
1328 natural riparian vegetation of northern Laos. *Journal of Environmental Quality*. 2008; 37, 3: 889-897.  
1329 <https://doi:10.2134/jeq2007.0251>
- 1330 106. Grossart H-P. Ecological Consequences of Bacterioplankton Lifestyles: Changes in Concepts Are Needed:  
1331 Ecological Consequences of Bacterioplankton Lifestyles. *Environmental Microbiology Reports*. 2010; 2, 6:  
1332 706-14. <https://doi.org/10.1111/j.1758-2229.2010.00179.x>.
- 1333 107. Drummond J.D, Davies-Colley R.J, Stott R, Sukias J.P, Nagels J.W, Sharp A, et al. Microbial Transport,  
1334 Retention, and Inactivation in Streams: A Combined Experimental and Stochastic Modeling Approach.  
1335 *Environmental Science & Technology*. 2015; 49, 13: 7825-33. <https://doi.org/10.1021/acs.est.5b01414>.
- 1336 108. Jeng H, England A, Bradford H. Indicator Organisms Associated with Stormwater Suspended Particles and  
1337 Estuarine Sediment. *Journal of Environmental Science and Health, Part A*. 2005; 40, 4: 779-91.  
1338 <https://doi.org/10.1081/ESE-200048264>.
- 1339 109. Johnson, G.D., Myers, W.L and Patil, G.P. 2001. Predictability of Surface Water Pollution Loading in  
1340 Pennsylvania using Watershed-based Landscape Measurements. *Journal of the American Water Resources*  
1341 *Association*, 37:821-835.
- 1342 110. Hua, Ang Kean. « Land Use Land Cover Changes in Detection of Water Quality: A Study Based on Remote  
1343 Sensing and Multivariate Statistics ». Édité par Evelyn O. Talbott. *Journal of Environmental and Public*  
1344 *Health* 2017 (9 mars 2017): 7515130. <https://doi.org/10.1155/2017/7515130>.
- 1345 111. Seidu R, Stenström T.A, Löfman O. A Comparative Cohort Study of the Effect of Rainfall and Temperature  
1346 on Diarrhoeal Disease in Faecal Sludge and Non-Faecal Sludge Applying Communities, Northern Ghana.  
1347 *Journal of Water and Climate Change*. 2013; 4, 2: 90-102. <https://doi.org/10.2166/wcc.2013.032>.
- 1348 112. Adkins H.J, Escamilla J, Santiago L.T, Ranoa C, Echeverria P, Cross J.H. Two-Year Survey of Etiologic  
1349 Agents of Diarrheal Disease at San Lazaro Hospital, Manila, Republic of the Philippines. *Journal of Clinical*  
1350 *Microbiology*. 1987: 1143-1147, 0095-1137/87/071143-05\$02.00/0
- 1351 113. Dewan A.M, Corner R, Hashizume M, Ongee E.T. Typhoid Fever and Its Association with Environmental  
1352 Factors in the Dhaka Metropolitan Area of Bangladesh: A Spatial and Time-Series Approach. *PLoS*  
1353 *Neglected Tropical Diseases*. 2013; 7, 1: e1998. <https://doi.org/10.1371/journal.pntd.0001998>.
- 1354 114. Alexander K.A., Heaney A.K., Shaman J. Hydrometeorology and flood pulse dynamics drive diarrheal disease  
1355 outbreaks and increase vulnerability to climate change in surface-water-dependent populations: A  
1356 retrospective analysis. *Plos Medicine*. 2018; 15, 11, e1002688. <https://doi.org/10.1371/journal.pmed.1002688>

- 1357 115. Nitiema L.W, Nordgren J, Ouermi D, Dianou D, Traore A.S, Svensson L, et al. Burden of Rotavirus and  
1358 Other Enteropathogens among Children with Diarrhea in Burkina Faso. *International Journal of Infectious*  
1359 *Diseases*. 2011; 15, 9: e646-52. <https://doi.org/10.1016/j.ijid.2011.05.009>.
- 1360 116. Bonkougou I.J.O, Ouédraogo N, Tamini L, Teguera R.K, Yaméogo P, Drabo M.K, et al. Rotavirus and  
1361 Norovirus in Children with Severe Diarrhea in Burkina Faso before Rotavirus Vaccine Introduction. *Journal*  
1362 *of Medical Virology*. 2018 ; 90, 9: 1453-60. <https://doi.org/10.1002/jmv.25213>.
- 1363 117. Mwenda J.M, Ntoto K.M, Abebe A, Enweronu-Laryea C, Amina I, Mchomvu J, et al. Burden and  
1364 Epidemiology of Rotavirus Diarrhea in Selected African Countries: Preliminary Results from the African  
1365 Rotavirus Surveillance Network. *The Journal of Infectious Diseases*. 2010; 202, S1: S5-11.  
1366 <https://doi.org/10.1086/653557>.
- 1367 118. Chen, H. J., et H. Chang. « Response of Discharge, TSS, and E. Coli to Rainfall Events in Urban, Suburban,  
1368 and Rural Watersheds ». *Environ. Sci.: Processes Impacts* 16, n° 10 (2014): 2313-24.  
1369 <https://doi.org/10.1039/C4EM00327F>.
- 1370 119. Hamilton, Jorene L., et Ingrid Luffman. « Precipitation, Pathogens, and Turbidity Trends in the Little River,  
1371 Tennessee ». *Physical Geography* 30, n° 3 (mai 2009): 236-48. <https://doi.org/10.2747/0272-3646.30.3.236>.
- 1372 120. Boithias, Laurie, Olivier Ribolzi, Guillaume Lacombe, Chanthamousone Thammahacksa, Norbert Silvera,  
1373 Keoudone Latsachack, Bounsamay Souleuth, et al. « Quantifying the Effect of Overland Flow on  
1374 Escherichia Coli Pulses during Floods: Use of a Tracer-Based Approach in an Erosion-Prone Tropical  
1375 Catchment ». *Journal of Hydrology* 594 (mars 2021): 125935. <https://doi.org/10.1016/j.jhydrol.2020.125935>.
- 1376 121. Kraay, Alicia N. M., Olivia Man, Morgan C. Levy, Karen Levy, Edward Ionides, et Joseph N. S. Eisenberg.  
1377 « Understanding the Impact of Rainfall on Diarrhea: Testing the Concentration-Dilution Hypothesis Using a  
1378 Systematic Review and Meta-Analysis ». *Environmental Health Perspectives* 128, n° 12 (décembre 2020):  
1379 126001. <https://doi.org/10.1289/EHP6181>.
- 1380 122. Alemayehu, Bezuayehu, Birhanu Teshome Ayele, Fekadu Melak, et Argaw Ambelu. « Exploring the  
1381 Association between Childhood Diarrhea and Meteorological Factors in Southwestern Ethiopia ». *Science of*  
1382 *The Total Environment* 741 (novembre 2020): 140189. <https://doi.org/10.1016/j.scitotenv.2020.140189>.
- 1383 123. Wisner B, Blaikie P, Cannon T, Davis I. At risk, natural hazards. People's Vulnerability and Disasters, 2<sup>nd</sup>  
1384 edition, Routledge, 2004.
- 1385 124. Birkmann, J, Cardona O.D, Carreño M.L, Barbat A.H, Pelling M, Schneiderbauer S, Kienberger S, et al.  
1386 Framing Vulnerability, Risk and Societal Responses: The MOVE Framework. *Natural Hazards*. 2013; 67, 2:  
1387 193-211. <https://doi.org/10.1007/s11069-013-0558-5>.
- 1388 125. Becerra S, Saqalli M. Gangneron F, Dia A.H. Everyday Vulnerabilities and “Social Dispositions” in the  
1389 Malian Sahel, an Indication for Evaluating Future Adaptability to Water Crises?. *Regional Environmental*  
1390 *Change*. 2016; 16, 5: 1253-65. <https://doi.org/10.1007/s10113-015-0845-7>.
- 1391 126. Dinko D.H, Yaro J, Kusimi J. Political Ecology and Contours of Vulnerability to Water Insecurity in Semi-arid  
1392 North-Eastern Ghana. *Journal of Asian and African Studies*. 2019; 54, 2: 282-99.  
1393 <https://doi.org/10.1177/0021909618811838>.
- 1394 127. Tetreault D. Three Forms of Political Ecology. *Ethics and the Environment*. 2017; 22, 2: 1.  
1395 <https://doi.org/10.2979/ethicsenviro.22.2.01>.

- 1396 128. Bonnassieux A, Gangneron F. Des mini-réseaux d'eau potable : entre enjeux politiques et arrangements  
1397 locaux. Le cas de la commune de Djougou au Bénin. Mondes en développement. 2011; 155, 3: 77.  
1398 <https://doi.org/10.3917/med.155.0077>.
- 1399 129. Gangneron F, Pierre C, Robert E, Grippa M, Kergoat L, Hiernaux P, et al. Fulani pastoralism: between climate  
1400 harshness and political marginality, submitted, Regional Environmental Change
- 1401 130. Batterman S, Eisenberg J, Hardin R, Kruk M.E, Lemos M.C, Michalak A.N, Mukherjee B, et al. Sustainable  
1402 Control of Water-Related Infectious Diseases: A Review and Proposal for Interdisciplinary Health-Based  
1403 Systems Research . Environmental Health Perspectives; 2009; 117, 7: 1023-32.  
1404 <https://doi.org/10.1289/ehp.0800423>.
- 1405
